# Supplementary material for: An essential Trypanosoma brucei protein kinase: a functional analysis of regulation and the identification of inhibitors
Source: Front Parasitol. 2023 Nov 14;2:1272378. doi: 10.3389/fpara.2023.1272378 (PMC10720658; doi:10.3389/fpara.2023.1272378)
Supplement: Supplementary file 3 [file Table_2.xlsx]

## Sheet: % loss of FRET
Selleck #	Name	Rep 1	Rep 2	Rep 3	average	SEM
S1529	Hesperadin	103.29	93.95	94.96	97.4	2.9594
S1533	R406 (free base)	93.75	86.64	81.72	87.37	3.49189
S2194	R406	92.36	87.11	76.59	85.3533	4.63636
S2718	TAK-901	78.48	72.57	88.56	79.87	4.66794
S2904	PF-477736	81.46	69.44	79.79	76.8967	3.75937
S1017	Cediranib (AZD2171)	58.83	59.32	72.17	63.44	4.36729
S7094	PF-3758309	70.89	51.8	62.64	61.7767	5.52769
S2162	AZD1480	47.23	46.71	75.48	56.4733	9.50452
S7847	SGI-7079	54.08	57.98	56.74	56.2667	1.15044
S2214	AZ 960	58.75	61.97	48.04	56.2533	4.21055
S1111	Foretinib (GSK1363089)	49.5	50.19	68.26	55.9833	6.14156
S2719	AMG-900	46.38	53	67.58	55.6533	6.26206
S7644	PF-431396	54.45	51.19	59.67	55.1033	2.46966
S1275	BX-912	43.55	65.88	49.26	52.8967	6.69767
S1005	Axitinib	44.53	39.98	72.69	52.4	10.2297
S1134	AT9283	42.54	45.64	67.86	52.0133	7.97371
S2158	KW-2449	59.33	59.73	35.76	51.6067	7.92417
S2626	LY2784544	52.55	56.99	37.4	48.98	5.93017
S1532	AZD7762	76.17	31.97	37.39	48.51	13.9182
S2890	PF-562271	47.55	46.32	46.52	46.7967	0.381066
S3026	Piceatannol	47.52	49.79	34.88	44.0633	4.63819
S7271	FRAX597	40.88	39.18	50.87	43.6433	3.64651
S7774	SU6656	67.06	25.97	37.8	43.61	12.2122
S2013	PF-573228	42.16	50.95	25.31	39.4733	7.52254
S2672	PF-00562271	29.19	28.94	53.17	37.1	8.03532
S1068	Crizotinib (PF-02341066)	25.58	30.12	50.53	35.41	7.67276
S7545	G-749	35.25	25.87	44.88	35.3333	5.48787
S1080	SU11274	20.55	30.65	51.01	34.07	8.95778
S2161	RAF265 (CHIR-265)	15.7	31.85	54.56	34.0367	11.2711
S7492	Uprosertib (GSK2141795)	33.7	42.33	23.48	33.17	5.44798
S2692	TG101348 (SAR302503)	19.77	26.8	48.13	31.5667	8.52669
S2625	Fostamatinib (R788)	32.06	29.74	32.04	31.28	0.770022
S2198	SGI-1776 free base	13.03	34.12	42.82	29.99	8.84409
S2896	ZM 323881 HCl	47.71	26.7	14.85	29.7533	9.60793
S2872	GZD824	32.95	38.17	17.17	29.43	6.3125
S1454	PHA-680632	34.16	33.7	19.9	29.2533	4.67855
S7582	AP26113	39.84	10.53	32.96	27.7767	8.84909
S1249	JNJ-7706621	12.09	27.83	43.34	27.7533	9.02118
S1558	AT7867	8.06	32.38	41.58	27.34	9.99915
S2683	CHIR-124	24.71	37.77	15.33	25.9367	6.50684
S2820	TAE226 (NVP-TAE226)	24.91	40.16	10.15	25.0733	8.66353
S2201	BMS-794833	28.27	7.86	37.65	24.5933	8.79393
S1536	CP-673451	25.61	30.84	16.81	24.42	4.09358
S1107	Danusertib (PHA-739358)	27.19	28.32	17.19	24.2333	3.53674
S1451	Aurora A Inhibitor I	18.59	27.62	26.09	24.1	2.79018
S1342	Genistein	0.41	39.76	29.8	23.3233	11.8119
S1124	BMS-754807	22.15	31.61	15.42	23.06	4.69575
S1378	Ruxolitinib (INCB018424)	14.69	29.81	23.36	22.62	4.38042
S1012	BMS-536924	16.07	36.99	12.14	21.7333	7.71223
S2622	PP121	16.18	43.29	5.26	21.5767	11.3051
S1021	DCC-2036 (Rebastinib)	4.22	26.52	33.87	21.5367	8.91452
S1181	ENMD-2076	11.17	16.69	34.72	20.86	7.11084
S1084	Brivanib (BMS-540215)	6.08	18.25	36.31	20.2133	8.78169
S1028	Lapatinib (GW-572016) Ditosylate	23.48	37.83	-2.73	19.5267	11.8743
S2902	S-Ruxolitinib (INCB018424)	20.19	28.14	10	19.4433	5.24986
S2770	MK-5108 (VX-689)	28.08	23.65	6.22	19.3167	6.67204
S1352	TG100-115	-5.15	47.15	15.91	19.3033	15.1927
S7582	Anacardic Acid	5.69	40.96	11.07	19.24	10.9705
S2842	SAR245409 (XL765)	30.56	22.62	3.46	18.88	8.04349
S2730	Crenolanib (CP-868596)	25.26	24.52	6.61	18.7967	6.09708
S1590	TWS119	5.79	6.1	44.2	18.6967	12.752
S7397	Sorafenib	22.03	20.77	9.78	17.5267	3.89037
S1033	Nilotinib (AMN-107)	-5.35	8.78	48.95	17.46	16.2648
S1234	AG-1024	30.54	14.57	6.85	17.32	6.97557
S1040	Sorafenib Tosylate	24.17	23.62	3.33	17.04	6.85684
S1018	Dovitinib (TKI-258, CHIR-258)	7.25	8.42	34.99	16.8867	9.05797
S1171	CYT387	-1.21	20.71	29.27	16.2567	9.07619
S2671	AS-252424	14.81	40.21	-6.98	16.0133	13.6359
S1011	Afatinib (BIBW2992)	18.3	45.11	-16.75	15.5533	17.9102
S2895	Tyrphostin 9	16.63	14.39	14.36	15.1267	0.751717
S1042	Sunitinib Malate	4.66	9.35	30.2	14.7367	7.84931
S7087	GSK2334470	37.13	1.48	5.54	14.7167	11.2678
S2670	A-674563	8.73	40.44	-6.77	14.1333	13.8936
S8040	GDC-0349	6.9	27.91	6.02	13.61	7.15451
S3600	Schisandrin B (Sch B)	-1.31	45.6	-3.55	13.58	16.0231
S7526	GNF-5	1.87	32.15	5.98	13.3333	9.48285
S1486	AEE788 (NVP-AEE788)	-5.02	24.8	17.96	12.58	9.0188
S7565	WH-4-023	12.96	15.67	8.92	12.5167	1.96112
S2542	Phenformin HCl	2.54	16.98	16.76	12.0933	4.77709
S7039	PD168393	18.37	9.2	8.57	12.0467	3.16689
S7528	GNE-7915	20.21	-0.21	15.79	11.93	6.20266
S1178	Regorafenib (BAY 73-4506)	12.31	16.79	5.48	11.5267	3.28832
S1008	Selumetinib (AZD6244)	50.48	-3.72	-12.49	11.4233	19.6918
S2179	GDC-0068	3.7	19.8	10.76	11.42	4.65937
S2742	PHA-767491	2.43	12.32	19.36	11.37	4.9103
S1006	Saracatinib (AZD0530)	8.38	0	25.72	11.3667	7.57341
S2755	Varlitinib	7.95	12.83	13.05	11.2767	1.66455
S1556	PHT-427	15.92	7.73	9.99	11.2133	2.44209
S7343	URMC-099	19.55	8.96	5.08	11.1967	4.32424
S7563	AT13148	2.2	1.92	29.02	11.0467	8.98703
S2686	NVP-BSK805 2HCl	13.14	22.05	-3.06	10.71	7.34976
S1021	Dasatinib	8.69	30.94	-7.71	10.64	11.1998
S2824	TPCA-1	6.04	5.07	20.71	10.6067	5.05942
S2769	Dovitinib (TKI-258) Dilactic Acid	13.8	20.51	-2.73	10.5267	6.90556
S8124	BMS-582949	3.18	19.68	8.69	10.5167	4.84992
S1459	Thiazovivin	3.59	4.5	23.24	10.4433	6.40372
S2842	SAR131675	14.1	4.91	12.04	10.35	2.78425
S7709	VX-680 (Tozasertib, MK-0457)	3.79	-5.94	33.04	10.2967	11.7134
S1171	CYC116	6.34	17.99	6.52	10.2833	3.85368
S1361	MGCD-265	10.06	1.73	18.98	10.2567	4.98062
S1363	Ki8751	12.89	19.3	-1.55	10.2133	6.16587
S2617	TAK-733	23.8	-4.59	11.11	10.1067	8.21083
S7368	GNE-9605	12.68	11	6.14	9.94	1.96092
S7971	AZD3759	1.02	24.6	3.7	9.77333	7.45359
S1582	H 89 2HCl	-4.65	13.95	19.92	9.74	7.39852
S1010	Nintedanib (BIBF 1120)	19.15	15.82	-6.23	9.58	7.96323
S2783	Vistusertib (AZD2014)	-1.05	15.9	13.87	9.57333	5.34389
S1530	BIX 02188	-3.06	11.64	19.63	9.40333	6.64482
S1458	VX-745	-6.23	15.95	18.46	9.39333	7.8452
S2626	LY2603618	5.3	6.01	16.55	9.28667	3.63745
S1526	Quizartinib (AC220)	10.65	5.89	11.23	9.25667	1.69164
S7605	Filgotinib (GLPG0634)	24.28	-2.19	5.25	9.11333	7.88161
S7709	VX-11e	-0.25	26.56	0.74	9.01667	8.77632
S1113	GSK690693	10.24	3.35	12.8	8.79667	2.82182
S1342	GF109203X	13.72	0.51	12	8.74333	4.1465
S2864	IMD 0354	12.86	5.87	7.3	8.67667	2.13201
S1531	BKM120 (NVP-BKM120, Buparlisib)	-9.02	20.28	14.6	8.62	8.97112
S1138	Brivanib Alaninate (BMS-582664)	-4.5	7.4	22.51	8.47	7.81545
S7693	AZD6738	4.44	5.58	15.29	8.43667	3.44243
S1475	Pimasertib (AS-703026)	14.23	5.54	5.49	8.42	2.90504
S2391	Quercetin	11.11	11.7	2.23	8.34667	3.06307
S7566	IM-12	-0.21	5.8	19.38	8.32333	5.79418
S2872	GW5074	16.98	8.06	-0.38	8.22	5.01204
S7747	Ro-3306	4.91	13.48	5.98	8.12333	2.69609
S7871	LJI308	-3.11	22.63	4.6	8.04	7.62697
S8009	AG-18	-3.36	27.17	0.13	7.98	9.64775
S3012	Pazopanib	10.63	22.84	-9.61	7.95333	9.46263
S2774	MK-2461	-0.65	5.47	18.83	7.88333	5.7514
S7106	AZD3463	9.44	2.23	10.74	7.47	2.64674
S2806	CEP-33779	6.72	14.16	1.03	7.30333	3.80151
S1026	Imatinib Mesylate (STI571)	-4.49	30.77	-5.24	7.01333	11.8803
S8195	Oclacitinib	26.32	-3.33	-2.16	6.94333	9.69422
S2689	WAY-600	-8.01	15.89	11.97	6.61667	7.40036
S7167	SSR128129E	3.69	1	15.07	6.58667	4.31216
S7036	XL019	7.03	16.53	-4	6.52	5.93198
S7269	PD173955	11.04	13.19	-4.93	6.43333	5.71547
S2111	Lapatinib	12.23	11.94	-4.91	6.42	5.66562
S2406	Chrysophanic Acid	-1.47	-1.74	21.86	6.21667	7.82206
S2807	Dabrafenib (GSK2118436)	-0.56	5.26	13.89	6.19667	4.19756
S7065	MK-8745	17.23	8.61	-7.56	6.09333	7.26605
S7080	RN486	16.29	-0.76	2.58	6.03667	5.21655
S7067	Tepotinib (EMD 1214063)	-2.77	-2.69	23.45	5.99667	8.7267
S2753	Tivantinib (ARQ 197)	-3.17	0.91	19.83	5.85667	7.08525
S1020	PD184352 (CI-1040)	-0.56	-2.01	19.32	5.58333	6.88108
S7752	SC1	-5.54	21.24	0.96	5.55333	8.06466
S2692	TG101209	6.3	6.82	3.34	5.48667	1.08378
S2789	Tofacitinib (CP-690550,Tasocitinib)	10.94	-3.41	8.9	5.47667	4.48219
S1025	Gefitinib (ZD1839)	6.68	25.41	-15.72	5.45667	11.889
S8167	AMG 337	-9.41	24.22	1.51	5.44	9.90501
S8007	VE-821	-0.15	7.81	8.04	5.23333	2.69249
S7008	PP242	7.52	8.15	0.01	5.22667	2.61467
S7003	AZD2932	0.75	19.92	-5.22	5.15	7.58342
S3056	Miltefosine	10.58	19.13	-14.83	4.96	10.1982
S1573	Fasudil (HA-1077) HCl	3.74	3.8	7.25	4.93	1.16013
S2235	Volasertib (BI 6727)	4.35	4.01	6.4	4.92	0.746481
S2745	CHIR-98014	9.18	-8.63	13.62	4.72333	6.79858
S2816	Tyrphostin AG 879	5.16	4.48	4.35	4.66333	0.251153
S2911	Go 6983	3.88	18.59	-8.51	4.65333	7.83265
S1101	Vatalanib (PTK787) 2HCl	0.71	-1.41	14.53	4.61	4.99761
S2185	AST-1306	3.99	12.48	-3.01	4.48667	4.47847
S2897	ZM 306416	3.55	2.28	7.59	4.47333	1.60088
S2680	Ibrutinib (PCI-32765)	-1.13	6.64	7.86	4.45667	2.81545
S7793	Purvalanol A	25.42	-7.19	-4.9	4.44333	10.5091
S2761	NVP-BVU972	12.58	-4.75	5.2	4.34333	5.02104
S4001	Cabozantinib malate (XL184)	7.03	6.05	-0.07	4.33667	2.22142
S7877	ONO-4059 analogue	18.67	-13.17	7.5	4.33333	9.32679
S2673	Trametinib (GSK1120212)	-9.97	11.88	11.03	4.31333	7.14588
S7980	VPS34-IN1	17.21	-6.61	2.14	4.24667	6.95645
S1104	GDC-0941	6.07	-4.62	11.25	4.23333	4.67241
S1267	Vemurafenib (PLX4032, RG7204)	0.73	6.12	5.63	4.16	1.72082
S1392	Pelitinib (EKB-569)	9.11	3.52	-0.22	4.13667	2.71093
S1103	ZM 447439	-0.41	-9.02	21.83	4.13333	9.19079
S7714	FIIN-2	20.64	-6.6	-1.69	4.11667	8.38237
S2882	IKK-16 (IKK Inhibitor VII)	-6.77	8.78	10.21	4.07333	5.43736
S2688	R547	-2.77	1.47	13.51	4.07	4.87612
S8036	Butein	2.56	10	-0.42	4.04667	3.09848
S2134	AZD8330	6.44	1.12	4.52	4.02667	1.55543
S8058	P276-00	1.62	3.63	6.76	4.00333	1.49549
S1244	Amuvatinib (MP-470)	15.24	-1.82	-2.02	3.8	5.72029
S8019	AZD5363	4.09	5.06	2.21	3.78667	0.836587
S1179	WZ8040	-16.96	12.98	15.25	3.75667	10.379
S7136	CGK 733	6.69	10.78	-6.22	3.75	5.12291
S2636	A66	8.6	-3.89	6.43	3.71333	3.85293
S1167	CP-724714	4.84	-2.35	8.46	3.65	3.1768
S3012	Pazopanib HCl	3.98	15.13	-9.91	3.06667	7.24284
S2220	SB590885	0.66	-7.68	16.18	3.05333	6.99097
S1093	GSK2126458 (GSK458)	-2.26	20.61	-9.29	3.02	9.0261
S8322	LY3023414	6.91	-2.44	4.58	3.01667	2.81002
S1173	WZ4002	28.37	-2.74	-16.64	2.99667	13.3061
S1263	CHIR-99021 (CT99021)	3.87	-9.47	13.99	2.79667	6.79355
S1032	Motesanib Diphosphate (AMG-706)	-5.11	3.33	10.14	2.78667	4.41067
S1066	SL-327	-7.84	-0.71	16.9	2.78333	7.35231
S2193	GSK461364	3	2.64	2.45	2.69667	0.16128
S1049	Y-27632 2HCl	9.64	2.31	-3.96	2.66333	3.92995
S7320	TG003	9.3	-0.9	-1.09	2.43667	3.4321
S2243	Degrasyn (WP1130)	-16.16	15.97	7.31	2.37333	9.59796
S2845	Semaxanib (SU5416)	10.62	-7.06	3.55	2.37	5.13777
S8041	Cobimetinib (GDC-0973, RG7420)	16.69	-7.86	-1.74	2.36333	7.37798
S7198	BIO	14.74	-3.19	-4.99	2.18667	6.29814
S1044	Temsirolimus (CCI-779, NSC 683864)	-11.14	5.79	11.73	2.12667	6.85138
S1133	Alisertib (MLN8237)	6.14	8.42	-8.33	2.07667	5.2448
S2801	AZD4547	6.1	9.85	-9.73	2.07333	6.00013
S2635	CCT128930	-1.44	2.17	5.43	2.05333	1.98406
S1577	Tie2 kinase inhibitor	3.52	11.14	-8.51	2.05	5.71989
S8004	ZM 39923 HCl	-0.41	0.75	5.5	1.94667	1.80795
S2227	PIK-294	1.06	13.18	-8.43	1.93667	6.25365
S8023	TCS 359	2.62	0.12	2.82	1.85333	0.868588
S7870	LJH685	-4.16	5.3	4.12	1.75333	2.97622
S1022	Ridaforolimus (Deforolimus, MK-8669)	-1.75	24.89	-17.92	1.74	12.4808
S2310	Honokiol	5.38	8.05	-8.49	1.64667	5.1266
S1117	TSU-68 (SU6668, Orantinib)	3.9	3.85	-3.09	1.55333	2.32171
S1164	Lenvatinib (E7080)	-7.27	-4.46	15.96	1.41	7.32008
S8002	GSK2636771	9.06	-5.54	0	1.17333	4.25529
S7198	BIRB 796 (Doramapimod)	-2.9	-0.98	7.24	1.12	3.10979
S8015	CEP-32496	16.21	-8.89	-4.02	1.1	7.68469
S1003	Linifanib (ABT-869)	-0.22	-10.6	14.06	1.08	7.14834
S2817	Torin 2	1.23	-3.91	5.89	1.07	2.83015
S1170	WZ3146	4.73	8.2	-9.74	1.06333	5.49376
S7291	TAK-632	10.1	1.09	-8.05	1.04667	5.2395
S2202	NVP-BHG712	10.04	-0.45	-6.59	1	4.8551
S1034	NVP-AEW541	-1.93	-9.34	14.26	0.996667	6.96812
S1490	Ponatinib (AP24534)	11.32	6.08	-14.6	0.933333	7.9126
S1014	Bosutinib (SKI-606)	15.31	-2.75	-9.88	0.893333	7.49643
S7953	ETC-1002	1.59	3.84	-2.79	0.88	1.94656
S1154	SNS-314 Mesylate	3.16	4.16	-4.88	0.813333	2.86127
S1275	BYL719	5.93	-7.36	3.47	0.68	4.08224
S4001	CAL-101 (Idelalisib, GS-1101)	3.57	10.7	-12.29	0.66	6.79426
S2216	Mubritinib (TAK 165)	-0.27	0.57	1.58	0.626667	0.5348
S2014	BMS-265246	0.34	8.65	-7.4	0.53	4.63421
S2859	Golvatinib (E7050)	6.8	3.28	-8.5	0.526667	4.62631
S1104	GDC-0980 (RG7422)	3.96	-8.49	5.93	0.466667	4.5143
S2728	AG-1478 (Tyrphostin AG-1478)	1.36	6.25	-6.25	0.453333	3.6368
S1102	U0126-EtOH	-4.69	-2.57	8.59	0.443333	4.11905
S7422	KN-62	10.23	-6.46	-2.84	0.31	5.06889
S7050	AZ20	-0.77	7.84	-6.31	0.253333	4.11667
S2747	AMG-458	7.4	-4.86	-1.78	0.253333	3.68229
S7854	Ulixertinib (BVD-523, VRT752271)	0.2	-1.97	2.23	0.153333	1.21266
S7102	VE-822	5.88	4.36	-9.8	0.146667	4.99265
S8201	BI-78D3	2.85	-3.7	1.11	0.0866667	1.95883
S1487	PHA-793887	0.75	-8.04	7.08	-0.07	4.38398
S1485	HMN-214	-2.52	13.33	-11.16	-0.116667	7.17105
S7664	GSK2578215A	-3.79	1.97	1.34	-0.16	1.82409
S2682	CAY10505	2.16	2.8	-5.52	-0.186667	2.67306
S7041	CX-6258 HCl	-2.06	10.36	-8.91	-0.203333	5.6397
S2624	OSI-027	6.06	3.69	-11	-0.416667	5.33571
S2205	OSI-420	1.35	10.26	-12.97	-0.453333	6.76627
S1274	BX-795	-1.65	0.73	-0.45	-0.456667	0.687055
S7745	ANA-12	-1.46	-0.98	0.84	-0.533333	0.700508
S1114	JNJ-38877605	-7.74	-14.09	20.22	-0.536667	10.539
S2703	GSK1838705A	5.68	5.69	-13.1	-0.576667	6.26167
S7173	CC-292 (AVL-292)	-2.65	7.87	-7.22	-0.666667	4.46756
S1561	BMS-777607	-9.56	-9.55	16.8	-0.77	8.785
S1531	BIX 02189	-6.16	-6.8	10.18	-0.926667	5.55641
S8032	PRT062607 (P505-15, BIIB057) HCl	0.72	-1.64	-1.87	-0.93	0.827667
S2554	Daphnetin	2.88	-11.38	5.1	-1.13333	5.16326
S1072	ZSTK474	7.56	-0.56	-10.63	-1.21	5.26105
S7153	10058-F4	9.08	-2.68	-10.11	-1.23667	5.58648
S2700	KX2-391	3.16	4.68	-11.61	-1.25667	5.19523
S7214	Skepinone-L	9.73	-2.27	-11.28	-1.27333	6.0855
S1089	Refametinib (RDEA119, Bay 86-9766)	-3.52	-13.58	13.28	-1.27333	7.83476
S1078	MK-2206 2HCl	2.95	2.26	-9.15	-1.31333	3.92339
S2726	PH-797804	3.96	-9.84	1.62	-1.42	4.26385
S1064	MEK162 (ARRY-162, ARRY-438162)	0.02	-4.57	0.22	-1.44333	1.5644
S5001	Tofacitinib (CP-690550) Citrate	7.37	-3.32	-8.45	-1.46667	4.65991
S7642	D 4476	-7.09	-4.11	6.7	-1.5	4.18928
S2661	WYE-125132 (WYE-132)	8.95	-8.57	-5.03	-1.55	5.34853
S7964	PLX7904	-3.91	2.9	-4.1	-1.70333	2.30232
S7541	Decernotinib (VX-509)	-1.81	-6.08	2.66	-1.74333	2.52324
S1177	PD98059	3.36	2.36	-11	-1.76	4.62901
S7060	PP1	-1.11	6.41	-11	-1.9	5.04133
S1802	AICAR (Acadesine)	8.57	-1.01	-13.31	-1.91667	6.33246
S1109	BI 2536	6.14	4.15	-16.04	-1.91667	7.08499
S2231	Telatinib	1.88	-0.37	-7.36	-1.95	2.78189
S7008	PP2	3.48	3.67	-13.04	-1.96333	5.5386
S2767	3-Methyladenine (3-MA)	3.93	-5.61	-4.72	-2.13333	3.04253
S7938	GSK2292767	-7.93	-2.88	4.32	-2.16333	3.55438
S1094	PF-04217903	1.05	-2.4	-5.21	-2.18667	1.81025
S7636	SU9516	1.43	-8.94	0.5	-2.33667	3.31256
S2784	TAK-285	1.56	-11.14	2.5	-2.36	4.39838
S2759	CUDC-907	1.44	-8.94	0.27	-2.41	3.28242
S7209	GSK650394	-3.89	7.73	-11.24	-2.46667	5.52222
S1474	GSK429286A	8.83	-3.72	-12.52	-2.47	6.19482
S1207	Tivozanib (AV-951)	2.26	-4.45	-5.25	-2.48	2.38123
S2386	Indirubin	-1.28	3.38	-9.6	-2.5	3.79633
S2811	INK 128 (MLN0128)	2.36	-10.14	0.19	-2.53	3.85622
S1230	Flavopiridol (Alvocidib)	-1.23	1.22	-7.63	-2.54667	2.63823
S2729	SB415286	2.09	3.52	-13.36	-2.58333	5.40412
S2924	CHIR-99021 (CT99021) HCl	-1.09	4.98	-11.75	-2.62	4.88975
S8031	NSC 23766	-10.81	-4.1	6.95	-2.65333	5.17765
S2221	Apatinib	8.23	-9.58	-6.63	-2.66	5.51119
S1524	AT7519	-4.04	7.32	-11.54	-2.75333	5.48229
S1194	CUDC-101	-5.38	-14.6	11.7	-2.76	7.70435
S1106	OSU-03012 (AR-12)	4	-1.57	-10.9	-2.82333	4.34667
S8003	PQ 401	-7.86	-6.28	5.56	-2.86	4.23463
S1570	KU-60019	2.55	-0.96	-10.29	-2.9	3.83141
S7114	NU6027	-5.16	7	-10.6	-2.92	5.20267
S7741	SB239063	-13.06	-2.52	6.76	-2.94	5.72539
S8057	Pacritinib (SB1518)	-9.03	-7.39	7.56	-2.95333	5.27794
S2928	TAK-715	9.38	-10.61	-7.65	-2.96	6.22889
S7257	CO-1686 (AVL-301)	-5.88	5.56	-8.56	-2.96	4.32968
S8005	SMI-4a	-0.89	-4.26	-3.92	-3.02333	1.07117
S2891	GW441756	-2.72	-9.2	2.74	-3.06	3.45097
S8024	Tyrphostin AG 1296	-8.5	-2.97	2.15	-3.10667	3.07515
S7334	ERK5-IN-1	-8.83	7.84	-8.46	-3.15	5.49604
S7435	AR-A014418	-1.63	0.01	-8.2	-3.27333	2.50841
S7734	LFM-A13	-1.51	-3.06	-5.31	-3.29333	1.10315
S7998	Entrectinib (RXDX-101)	-0.87	-3.74	-5.65	-3.42	1.38911
S2621	AZD5438	-3.84	-1.79	-4.86	-3.49667	0.902706
S7813	AMG319	-9.75	-5.92	5.12	-3.51667	4.45762
S2751	Milciclib (PHA-848125)	4.08	-3.91	-10.81	-3.54667	4.30221
S7121	MLN2480	-3.55	7.05	-14.26	-3.58667	6.15169
S7356	HS-173	-0.85	3.46	-13.41	-3.6	5.06034
S1557	KRN 633	-1.28	7.05	-16.78	-3.67	6.98215
S2681	AS-604850	-3.89	2.32	-9.54	-3.70333	3.42496
S7508	JNK Inhibitor IX	2.51	-8.04	-5.6	-3.71	3.18877
S7722	Bikinin	-4.62	-3.05	-3.6	-3.75667	0.45994
S1226	KU-0063794	-1.89	1.41	-10.8	-3.76	3.64663
S1362	Rigosertib (ON-01910)	8.16	-13.74	-5.75	-3.77667	6.39852
S1460	SP600125	15	-8.81	-17.67	-3.82667	9.75461
S1036	PD0325901	4.85	-0.3	-16.22	-3.89	6.34172
S1572	BS-181 HCl	-2.44	0.01	-9.24	-3.89	2.76692
S1119	Cabozantinib (XL184, BMS-907351)	-3.1	1.69	-10.49	-3.96667	3.54267
S1117	Triciribine	2.17	-7.25	-7.23	-4.10333	3.13667
S1100	MLN8054	0.6	-2.95	-10.08	-4.14333	3.14026
S1064	Masitinib (AB1010)	-5.01	3.16	-10.74	-4.19667	4.03314
S7253	AZD2858	2.56	-10.5	-4.94	-4.29333	3.78394
S1568	PD318088	9.89	-11.22	-11.8	-4.37667	7.1353
S2899	GNF-2	-0.77	2.91	-15.29	-4.38333	5.55584
S1169	TGX-221	-9.35	-15.94	12.04	-4.41667	8.44538
S7886	CC-223	-4.49	-6.05	-2.8	-4.44667	0.938444
S1153	Roscovitine (Seliciclib,CYC202)	-2.58	-0.26	-10.57	-4.47	3.12266
S7104	AZD1208	1.93	-2.35	-13.21	-4.54333	4.50603
S7176	SKI II	0.17	-6.48	-7.32	-4.54333	2.36911
S1105	LY294002	1.99	-0.82	-15.14	-4.65667	5.30406
S2768	Dinaciclib (SCH727965)	-1.29	-3.52	-9.27	-4.69333	2.37716
S6005	VX-702	0.98	0.36	-15.65	-4.77	5.44294
S1145	SNS-032 (BMS-387032)	-0.77	-9.89	-3.81	-4.82333	2.68103
S2626	LY2835219	-1.87	-0.07	-12.7	-4.88	3.94438
S7257	CNX-774	0.1	-7.38	-7.5	-4.92667	2.51357
S7627	LDN-214117	-4.4	-5.33	-5.09	-4.94	0.278747
S7248	Ro3280	-3.29	0.94	-12.66	-5.00333	4.01836
S2749	BGT226 (NVP-BGT226)	-1.99	1.64	-14.91	-5.08667	5.02221
S1143	AG-490 (Tyrphostin B42)	-4.1	-17.3	6.05	-5.11667	6.7597
S1462	AZD6482	4.89	0.71	-21.56	-5.32	8.20917
S2207	PIK-293	-3.56	-3.94	-8.77	-5.42333	1.67693
S2238	Palomid 529 (P529)	-4.38	3.31	-15.25	-5.44	5.38396
S2699	CH5132799	3.69	-5.64	-14.45	-5.46667	5.23728
S7544	Vacquinol-1	-3.16	-9.82	-3.78	-5.58667	2.12422
S1070	PHA-665752	-7.46	-19.43	9.98	-5.63667	8.53874
S2922	Icotinib	11.19	-2.31	-25.89	-5.67	10.8351
S7016	VS-5584 (SB2343)	-6.12	2.67	-13.84	-5.76333	4.76936
S1077	SB202190 (FHPI)	-2.9	-4.02	-10.4	-5.77333	2.33582
S2192	Sapitinib (AZD8931)	-3.78	-1.67	-11.89	-5.78	3.11513
S1147	Barasertib (AZD1152-HQPA)	-6.35	-0.82	-10.21	-5.79333	2.72491
S1038	PI-103	1.5	-8.28	-10.63	-5.80333	3.71415
S2205	OSI-906 (Linsitinib)	-1.1	-4.45	-12.71	-6.08667	3.44998
S8054	ASP3026	-11.92	-6.98	0.48	-6.14	3.60413
S2679	Flavopiridol HCl	-7.18	-15.04	3.78	-6.14667	5.45738
S8050	ETP-46464	-5.43	-7.66	-5.61	-6.23333	0.715223
S7289	PFK15	0.44	-8.1	-11.17	-6.27667	3.4733
S7928	DASA-58	-10.21	-7.47	-1.46	-6.38	2.58403
S1266	WYE-354	1.59	-1.9	-18.91	-6.40667	6.33233
S7725	BLZ945	-6.94	-5.12	-7.17	-6.41	0.648408
S1489	PIK-93	9.81	-9.5	-19.8	-6.49667	8.67858
S8319	7,8-Dihydroxyflavone	-12.16	-6.66	-0.75	-6.52333	3.29449
S1075	SB216763	-1.54	-6.02	-12.03	-6.53	3.03892
S1055	Enzastaurin (LY317615)	-2.3	-2.08	-15.93	-6.77	4.58044
S1076	SB203580	2.34	-7.92	-14.9	-6.82667	5.00669
S1104	GDC-0879	1.71	-11.16	-11.29	-6.91333	4.31183
S7177	PF-543	-0.18	-10.8	-9.78	-6.92	3.38284
S2697	A-769662	-5.29	-6.47	-9.38	-7.04667	1.21538
S2791	Sotrastaurin	-7.06	-5.7	-8.54	-7.1	0.820081
S4901	JNK-IN-8	4.04	-1.06	-24.49	-7.17	8.78425
S2867	WHI-P154	-3.57	-2	-16.02	-7.19667	4.43489
S2913	BAY 11-7082	-5.99	-11.91	-3.91	-7.27	2.39644
S7498	DDR1-IN-1	2.4	-14.34	-10.06	-7.33333	5.02105
S2163	PF-4708671	7.44	-14.56	-14.98	-7.36667	7.40433
S1219	YM201636	-8.17	-4.12	-9.9	-7.39667	1.71276
S7127	TIC10 Analogue	-3.55	-9.16	-9.48	-7.39667	1.92555
S1555	AZD8055	-5.83	-3.22	-13.23	-7.42667	2.99789
S8044	BMS-345541	-5.3	-11.48	-5.52	-7.43333	2.02433
S7898	GSK621	-7.97	-9.3	-5.21	-7.49333	1.2045
S7461	LDK378	-12.67	2.63	-12.81	-7.61667	5.12349
S7018	CZC24832	-2.66	-10.78	-9.86	-7.76667	2.56711
S7051	CGI1746	-2.67	-4.42	-16.92	-8.00333	4.48686
S1152	PLX-4720	-3.93	-7.77	-12.43	-8.04333	2.45754
S1220	OSI-930	-5.67	-4.02	-14.56	-8.08333	3.27318
S7525	XMD8-92	-1.52	-6.19	-16.57	-8.09333	4.44757
S2266	Asiatic Acid	5.62	-19.9	-10.56	-8.28	7.45467
S1039	Rapamycin (Sirolimus)	-4.74	-7.45	-12.93	-8.37333	2.4089
S2743	PF-04691502	-8.87	-15.72	-0.65	-8.41333	4.35632
S7319	EHop-016	-2.97	-8.6	-14.06	-8.54333	3.20153
S5002	Fingolimod (FTY720) HCl	-4.3	-5.64	-15.82	-8.58667	3.63729
S2720	ZM 336372	-7.78	-13.09	-5.16	-8.67667	2.33268
S7306	Dorsomorphin 2HCl	-9.83	-13.03	-3.44	-8.76667	2.81899
S4907	SC-514	-9.76	-2.53	-14.23	-8.84	3.40868
S1092	KU-55933 (ATM Kinase Inhibitor)	-4.86	-4.55	-17.13	-8.84667	4.14263
S2134	AZD9291	-7.7	-1.15	-17.72	-8.85667	4.81818
S7461	LDC000067	-2.99	-8.06	-15.77	-8.94	3.71541
S2746	AZ 628	-6.36	-8.18	-12.48	-9.00667	1.8144
S7423	KN-93 Phosphate	-15.5	1.89	-13.92	-9.17667	5.5521
S7093	IPA-3	-4.41	-3.88	-19.72	-9.33667	5.19392
S7776	Akti-1/2	-10.13	-10.42	-7.59	-9.38	0.898907
S2727	Dacomitinib (PF299804, PF299)	-5.31	-8.51	-15.05	-9.62333	2.86627
S2808	IPI-145 (INK1197)	-5.26	-7.75	-16.55	-9.85333	3.42462
S7195	RKI-1447	-0.67	-17.61	-11.72	-10	4.9652
S7215	Losmapimod (GW856553X)	-1.29	-8.5	-20.28	-10.0233	5.5346
S8294	Olmutinib (HM61713, BI 1482694)	-6.14	-14.28	-10.54	-10.32	2.35239
S7318	HTH-01-015	-2.27	-14.89	-14.28	-10.48	4.10878
S1056	AC480 (BMS-599626)	-7.03	-8.9	-16.07	-10.6667	2.75507
S7367	GNE-0877	1.86	-18.72	-15.34	-10.7333	6.37182
S2796	WP1066	-8.56	-8.8	-15.15	-10.8367	2.15778
S1093	GSK1904529A	0.93	-16.93	-20.56	-12.1867	6.64152
S7206	CNX-2006	-8.13	-5.81	-22.74	-12.2267	5.29916
S7145	AZD1080	-3.24	-18.61	-15.34	-12.3967	4.67463
S2843	BI-D1870	-13.48	-23.11	-4.62	-13.7367	5.33915
S7063	LY2090314	-4.89	-17.68	-21.38	-14.65	4.99552
S1120	Everolimus (RAD001)	-9.85	-10.18	-24.6	-14.8767	4.8626
S1494	LY2228820	-10.41	-12.86	-21.37	-14.88	3.32118
S4157	Chloroquine Phosphate	-8.93	-16.38	-20.01	-15.1067	3.26127
S8197	APTSTAT3-9R	-21.95	-13.6	-9.83	-15.1267	3.58104
S7317	WZ4003	-8.54	-20.95	-17.48	-15.6567	3.69664
S7091	Zotarolimus(ABT-578)	-15.16	-12.48	-22.13	-16.59	2.87601
S1116	Palbociclib (PD-0332991) HCl	-16.94	-11.63	-21.87	-16.8133	2.95671
S7352	Bay 11-7085	-8.62	-18.91	-23.43	-16.9867	4.3821
S1264	PD173074	17.9	-31.84	-39.25	-17.73	17.943
S1037	Perifosine (KRX-0401)	-19.56	-10.85	-23.82	-18.0767	3.81687
S2926	TDZD-8	-4.06	-18.25	-33.52	-18.61	8.50627
S2823	Tideglusib	-32.32	-30.02	-42.53	-34.9567	3.84443

## Sheet: Inhibitors
Catalog Number	Product Name	M.W.	CAS Number	Target	Formula	Form	Synonyms	SMILES	ALogP	HBA_Count	HBD_Count	RotatableBond
S1003	Linifanib (ABT-869)	375.41	796967-16-3	CSF-1R,PDGFR,VEGFR	C21H18FN5O	Free Base	AL-39324	CC1=CC(NC(=O)NC2=CC=C(C=C2)C2=C3C(N)=NNC3=CC=C2)=C(F)C=C1 |c:10,12,15,18,22,24,29,t:1,8,26|	4.169	2	4	3
S1005	Axitinib	386.47	319460-85-0	c-Kit,PDGFR,VEGFR	C22H18N4OS	Free Base	AG 013736	CNC(=O)C1=CC=CC=C1SC1=CC2=C(C=C1)C(\C=C\C1=CC=CC=N1)=NN2 |c:6,8,14,16,24,26,28,t:4,12,22|	4.492	3	2	5
S1006	Saracatinib (AZD0530)	542.03	379231-04-6	Bcr-Abl,Src	C27H32ClN5O5	Free Base	N/A	CN1CCN(CCOC2=CC(OC3CCOCC3)=C3C(NC4=C(Cl)C=CC5=C4OCO5)=NC=NC3=C2)CC1 |c:22,25,27,33,35,38,t:8,18|	3.814	7	1	8
S1008	Selumetinib (AZD6244)	457.68	606143-52-6	MEK	C17H15BrClFN4O3	Free Base	ARRY-142886	CN1C=NC2=C(F)C(NC3=CC=C(Br)C=C3Cl)=C(C=C12)C(=O)NOCCO |c:2,4,14,17,t:9,11,19|	3.234	3	3	6
S1010	Nintedanib (BIBF 1120)	539.62	656247-17-5	FGFR,PDGFR,VEGFR	C31H33N5O4	Free Base	N/A	COC(=O)C1=CC=C2C(NC(=O)\C2=C(/NC2=CC=C(C=C2)N(C)C(=O)CN2CCN(C)CC2)C2=CC=CC=C2)=C1 |c:6,18,20,38,40,42,t:4,16,36|	2.965	4	2	8
S1011	Afatinib (BIBW2992)	485.94	439081-18-2	EGFR,HER2	C24H25ClFN5O3	Free Base	N/A	CN(C)C\C=C\C(=O)NC1=CC2=C(NC3=CC=C(F)C(Cl)=C3)N=CN=C2C=C1O[C@H]1CCOC1 |r,c:11,20,23,25,28,t:9,14,16|	3.917	5	2	8
S1012	BMS-536924	479.96	468740-43-4	IGF-1R	C25H26ClN5O3	Free Base	N/A	CC1=C2N=C(NC2=CC(=C1)N1CCOCC1)C1=C(NC[C@@H](O)C2=CC=CC(Cl)=C2)C=CNC1=O |r,c:1,3,7,9,19,27,30,33,t:25|	2.385	3	4	6
S1014	Bosutinib (SKI-606)	530.45	380843-75-4	Src	C26H29Cl2N5O3	Free Base	N/A	COC1=C(Cl)C=C(Cl)C(NC2=C(C=NC3=CC(OCCCN4CCN(C)CC4)=C(OC)C=C23)C#N)=C1 |c:2,12,37,t:5,10,14,28,32|	4.883	4	1	9
S1017	Cediranib (AZD2171)	450.51	288383-20-0	VEGFR	C25H27FN4O3	Free Base	Recentin	COC1=C(OCCCN2CCCC2)C=C2N=CN=C(OC3=C(F)C4=C(NC(C)=C4)C=C3)C2=C1 |c:2,16,21,28,31,35,t:14,18,24|	4.761	5	1	8
S1018	Dovitinib (TKI-258, CHIR-258)	392.43	405169-16-6	c-Kit,FGFR,FLT3,PDGFR,VEGFR	C21H21FN6O	Citrate	CHIR-258	CN1CCN(CC1)C1=CC2=C(C=C1)N=C(N2)C1=C(N)C2=C(NC1=O)C=CC=C2F |c:10,12,15,19,22,28,30,t:8|	1.781	2	3	2
S1020	PD184352 (CI-1040)	478.67	212631-79-3	MEK	C17H14ClF2IN2O2	Free Base	N/A	FC1=CC=C(C(=O)NOCC2CC2)C(NC2=CC=C(I)C=C2Cl)=C1F |c:21,24,t:1,3,16,18|	4.907	2	2	6
S1021	Dasatinib	488.01	302962-49-8	Bcr-Abl,c-Kit,Src	C22H26ClN7O2S	Free Base	Sprycel	CC1=NC(NC2=NC=C(S2)C(=O)NC2=C(Cl)C=CC=C2C)=CC(=N1)N1CCN(CCO)CC1 |c:7,14,17,19,22,24,t:1,5|	3.439	4	3	7
S1022	Ridaforolimus (Deforolimus, MK-8669)	990.21	572924-54-0	mTOR	C53H84NO14P	Free Base	AP23573, MK-8669	[H][C@@]12CC[C@@H](C)[C@@](O)(O1)C(=O)C(=O)N1CCCC[C@@]1([H])C(=O)O[C@@H](CC(=O)[C@H](C)\C=C(C)\[C@@H](O)[C@@H](OC)C(=O)[C@H](C)C[C@H](C)\C=C\C=C\C=C(C)\[C@H](C2)OC)[C@H](C)C[C@@H]1CC[C@@H](OP(C)(C)=O)[C@@H](C1)OC |r,c:31,50,t:46,48|	6.303	12	1	8
S1025	Gefitinib (ZD1839)	446.9	184475-35-2	EGFR	C22H24ClFN4O3	Free Base	ZD-1839	COC1=C(OCCCN2CCOCC2)C=C2C(NC3=CC=C(F)C(Cl)=C3)=NC=NC2=C1 |c:2,25,27,29,32,t:15,19,21|	4.203	5	1	8
S1026	Imatinib Mesylate (STI571)	589.71	220127-57-1	Bcr-Abl,c-Kit,PDGFR	C30H35N7O4S	Mesylate	Glivec, CGP-57148B, STI-571	CS(O)(=O)=O.CN1CCN(CC2=CC=C(C=C2)C(=O)NC2=CC=C(C)C(NC3=NC=CC(=N3)C3=CC=CN=C3)=C2)CC1 |c:12,14,29,31,36,38,40,t:10,20,22,27,34|	3.806	4	2	7
S1028	Lapatinib (GW-572016) Ditosylate	925.46	388082-77-7	EGFR,HER2	C43H42ClFN4O10S3	Ditosylat	GW-57201	CC1=CC=C(C=C1)S(O)(=O)=O.CC1=CC=C(C=C1)S(O)(=O)=O.CS(=O)(=O)CCNCC1=CC=C(O1)C1=CC=C2N=CN=C(NC3=CC=C(OCC4=CC=CC(F)=C4)C(Cl)=C3)C2=C1 |c:3,5,14,16,32,40,53,56,60,64,t:1,12,30,36,38,42,45,47,51|	9.339	6	2	13
S1032	Motesanib Diphosphate (AMG-706)	569.44	857876-30-3	VEGFR,PDGFR,c-Kit	C22H29N5O9P2	Diphosphate	AMG-706	OP(O)(O)=O.OP(O)(O)=O.CC1(C)CNC2=CC(NC(=O)C3=C(NCC4=CC=NC=C4)N=CC=C3)=CC=C12 |c:19,25,27,30,32,34,t:13,23,36|	1.783	3	3	5
S1033	Nilotinib (AMN-107)	529.52	641571-10-0	Bcr-Abl	C28H22F3N7O	Free Base	Tasigna	CC1=CN(C=N1)C1=CC(NC(=O)C2=CC=C(C)C(NC3=NC=CC(=N3)C3=CN=CC=C3)=C2)=CC(=C1)C(F)(F)F |c:4,22,24,29,31,33,35,37,t:1,7,13,15,20,27|	5.084	5	2	7
S1034	NVP-AEW541	439.55	475489-16-8	IGF-1R	C27H29N5O	Free Base	AEW541	NC1=NC=NC2=C1C(=CN2[C@@H]1C[C@H](CN2CCC2)C1)C1=CC(OCC2=CC=CC=C2)=CC=C1 |r,c:3,5,8,30,32,34,36,t:1,23,28|	4.226	3	1	7
S1035	Pazopanib HCl (GW786034 HCl)	473.98	635702-64-6	c-Kit,PDGFR,VEGFR	C21H24ClN7O2S	Hydrochloride	GW786034	Cl.CN(C1=CC2=NN(C)C(C)=C2C=C1)C1=NC(NC2=CC=C(C)C(=C2)S(N)(=O)=O)=NC=C1 |c:9,12,24,30,32,t:2,4,15,19,21|	4.123	5	2	5
S1036	PD0325901	482.19	391210-10-9	MEK	C16H14F3IN2O4	Free Base	N/A	OC[C@@H](O)CONC(=O)C1=C(NC2=CC=C(I)C=C2F)C(F)=C(F)C=C1 |r,c:9,17,25,t:12,14,22|	2.578	2	4	7
S1038	PI-103	348.36	371935-74-9	Autophagy,DNA-PK,mTOR,PI3K	C19H16N4O3	Free Base	N/A	OC1=CC(=CC=C1)C1=NC2=C(OC3=C2C=CC=N3)C(=N1)N1CCOCC1 |c:3,5,13,16,18,21,t:1,8,10|	2.798	5	1	2
S1039	Rapamycin (Sirolimus)	914.18	53123-88-9	Autophagy,mTOR	C51H79NO13	Free Base	N/A	CO[C@@H]1C[C@H](C[C@@H](C)[C@@H]2CC(=O)[C@H](C)\C=C(C)\[C@@H](O)[C@@H](OC)C(=O)[C@H](C)C[C@H](C)\C=C\C=C\C=C(C)\[C@H](C[C@@H]3CC[C@@H](C)[C@@](O)(O3)C(=O)C(=O)N3CCCC[C@H]3C(=O)O2)OC)CC[C@H]1O |r,c:14,33,t:29,31|	6.295	10	2	6
S1040	Sorafenib Tosylate	637.03	475207-59-1	PDGFR,Raf,VEGFR	C28H24ClF3N4O6S	Tosylate	Bay 43-9006	CC1=CC=C(C=C1)S(O)(=O)=O.CNC(=O)C1=CC(OC2=CC=C(NC(=O)NC3=CC=C(Cl)C(=C3)C(F)(F)F)C=C2)=CC=N1 |c:3,5,32,39,41,43,t:1,15,19,21,27,29|	5.824	4	3	7
S1042	Sunitinib Malate	532.56	341031-54-7	c-Kit,PDGFR,VEGFR	C26H33FN4O7	Malate	SU-11248	O[C@@H](CC(O)=O)C(O)=O.CCN(CC)CCNC(=O)C1=C(C)NC(\C=C2/C(=O)NC3=CC=C(F)C=C23)=C1C |r,c:18,36,t:28,30,33|	-1.049	4	4	10
S1044	Temsirolimus (CCI-779, NSC 683864)	1030.29	162635-04-3	mTOR	C56H87NO16	Free Base	N/A	CO[C@@H]1C[C@H](C[C@@H](C)[C@@H]2CC(=O)[C@H](C)\C=C(C)\[C@@H](O)[C@@H](OC)C(=O)[C@H](C)C[C@H](C)\C=C\C=C\C=C(C)\[C@H](C[C@@H]3CC[C@@H](C)[C@@](O)(O3)C(=O)C(=O)N3CCCC[C@H]3C(=O)O2)OC)CC[C@H]1OC(=O)C(C)(CO)CO |r,c:14,33,t:29,31|	6.039	12	3	11
S1048	Tozasertib (VX-680, MK-0457)	464.59	639089-54-6	Aurora Kinase	C23H28N8OS	Free Base	N/A	CN1CCN(CC1)C1=NC(SC2=CC=C(NC(=O)C3CC3)C=C2)=NC(NC2=NNC(C)=C2)=C1 |c:23,25,33,35,t:8,12,14,29|	4.445	4	3	7
S1049	Y-27632 2HCl	320.26	129830-38-2	Autophagy,ROCK	C14H23Cl2N3O	Dihydrochloride	N/A	Cl.Cl.C[C@@H](N)[C@H]1CC[C@@H](CC1)C(=O)NC1=CC=NC=C1 |r,c:15,17,t:13|	1.871	2	2	3
S1055	Enzastaurin (LY317615)	515.61	170364-57-5	PKC	C32H29N5O2	Free Base	N/A	CN1C=C(C2=CC=CC=C12)C1=C(C(=O)NC1=O)C1=CN(C2CCN(CC3=NC=CC=C3)CC2)C2=CC=CC=C12 |c:2,6,30,32,40,t:4,8,12,20,28,38,42|	4.32	3	1	5
S1056	AC480 (BMS-599626)	567.01	714971-09-2	EGFR,HER2	C27H27FN8O3	Free Base	N/A	CC1=C2N(C=C1NC(=O)OC[C@@H]1COCCN1)N=CN=C2NC1=CC2=C(C=C1)N(CC1=CC=CC(F)=C1)N=C2 |r,c:4,19,21,27,29,36,39,42,t:1,25,34|	3.726	6	3	8
S1064	Masitinib (AB1010)	498.64	790299-79-5	c-Kit,PDGFR	C28H30N6OS	Free Base	N/A	CN1CCN(CC2=CC=C(C=C2)C(=O)NC2=CC(NC3=NC(=CS3)C3=CC=CN=C3)=C(C)C=C2)CC1 |c:8,10,22,28,30,35,t:6,16,20,26,32|	4.475	3	2	7
S1065	Pictilisib (GDC-0941)	513.64	957054-30-7	PI3K	C23H27N7O3S2	Free Base	N/A	CS(=O)(=O)N1CCN(CC2=CC3=NC(=NC(N4CCOCC4)=C3S2)C2=CC=CC3=C2C=NN3)CC1 |c:13,22,29,31,34,t:9,11,27|	2.153	6	1	5
S1066	SL-327	335.35	305350-87-2	MEK	C16H12F3N3S	Free Base	N/A	N\C(SC1=CC=C(N)C=C1)=C(\C#N)C1=C(C=CC=C1)C(F)(F)F |c:8,16,18,t:3,5,14|	3.705	0	2	4
S1068	Crizotinib (PF-02341066)	450.34	877399-52-5, 877399-53-6 (acetate)	ALK,c-Met	C21H22Cl2FN5O	Free Base	N/A	C[C@@H](OC1=C(N)N=CC(=C1)C1=CN(N=C1)C1CCNCC1)C1=C(Cl)C=CC(F)=C1Cl |r,c:3,6,8,14,24,27,30,t:11|	3.693	3	2	5
S1070	PHA-665752	641.61	477575-56-7	c-Met	C32H34Cl2N4O4S	Free Base	N/A	CC1=C(C(=O)N2CCC[C@@H]2CN2CCCC2)C(C)=C(N1)\C=C1/C(=O)NC2=C1C=C(C=C2)S(=O)(=O)CC1=C(Cl)C=CC=C1Cl |r,c:1,19,28,31,33,40,43,45|	5.689	4	2	7
S1072	ZSTK474	417.41	475110-96-4	PI3K	C19H21F2N7O2	Free Base	N/A	FC(F)C1=NC2=C(C=CC=C2)N1C1=NC(=NC(=N1)N1CCOCC1)N1CCOCC1 |c:7,9,16,18,t:3,5,14|	3.366	6	0	4
S1075	SB216763	371.22	280744-09-4	GSK-3	C19H12Cl2N2O2	Free Base	N/A	CN1C=C(C2=C1C=CC=C2)C1=C(C(=O)NC1=O)C1=CC=C(Cl)C=C1Cl |c:2,4,7,9,25,t:12,20,22|	4.391	2	1	2
S1076	SB203580	377.43	152121-47-6	p38 MAPK	C21H16FN3OS	Free Base	N/A	CS(=O)C1=CC=C(C=C1)C1=NC(=C(N1)C1=CC=NC=C1)C1=CC=C(F)C=C1 |c:5,7,12,18,20,28,t:3,10,16,23,25|	3.883	3	1	4
S1077	SB202190 (FHPI)	331.34	152121-30-7	p38 MAPK	C20H14FN3O	Free Base	N/A	OC1=CC=C(C=C1)C1=NC(=C(N1)C1=CC=NC=C1)C1=CC=C(F)C=C1 |c:3,5,10,16,18,26,t:1,8,14,21,23|	4.211	2	2	3
S1078	MK-2206 2HCl	480.39	1032350-13-2	Akt	C25H23Cl2N5O	Dihydrochloride	N/A	Cl.Cl.NC1(CCC1)C1=CC=C(C=C1)C1=C(C=C2C3=NNC(=O)N3C=CC2=N1)C1=CC=CC=C1 |c:8,10,24,27,32,34,t:6,13,15,17,30|	4.183	3	2	3
S1080	SU11274	568.09	658084-23-2	c-Met	C28H30ClN5O4S	Free Base	PKI-SU11274	CN(C1=CC(Cl)=CC=C1)S(=O)(=O)C1=CC2=C(NC(=O)\C2=C/C2=C(C)C(C(=O)N3CCN(C)CC3)=C(C)N2)C=C1 |c:5,7,23,41,t:2,13,15,36|	3.477	4	2	5
S1084	Brivanib (BMS-540215)	370.38	649735-46-6	FGFR,VEGFR	C19H19FN4O3	Free Base	N/A	C[C@@H](O)COC1=CN2N=CN=C(OC3=C(F)C4=C(NC(C)=C4)C=C3)C2=C1C |r,c:8,13,20,23,27,t:5,10,16|	3.481	4	2	5
S1089	Refametinib (RDEA119, Bay 86-9766)	572.34	923032-37-5	MEK	C19H20F3IN2O5S	Free Base	BAY 869766	COC1=C(NS(=O)(=O)C2(C[C@H](O)CO)CC2)C(NC2=CC=C(I)C=C2F)=C(F)C(F)=C1 |r,c:2,24,31,t:19,21,27|	2.827	3	4	9
S1091	Linsitinib (OSI-906)	421.49	867160-71-2	IGF-1R	C26H23N5O	Free Base	N/A	C[C@@]1(O)C[C@@H](C1)C1=NC(=C2N1C=CN=C2N)C1=CC=C2C=CC(=NC2=C1)C1=CC=CC=C1 |r,c:9,13,15,23,25,28,33,35,t:7,19,21,31|	3.757	3	1	3
S1092	KU-55933 (ATM Kinase Inhibitor)	395.49	587871-26-9	ATM/ATR	C21H17NO3S2	Free Base	N/A	O=C1C=C(OC(=C1)C1=CC=CC2=C1SC1=CC=CC=C1S2)N1CCOCC1 |c:2,5,10,12,18,20,t:8,16|	4.393	3	0	2
S1093	GSK1904529A	851.96	1089283-49-7	IGF-1R	C44H47F2N9O5S	Free Base	N/A	CCC1=CC(NC2=NC(=CC=N2)C2=C(N=C3C=CC=CN23)C2=CC(C(=O)NC3=C(F)C=CC=C3F)=C(OC)C=C2)=C(OC)C=C1N1CCC(CC1)N1CCN(CC1)S(C)(=O)=O |c:8,10,17,19,30,33,35,42,48,t:2,6,13,15,24,38,44|	6.571	8	2	12
S1094	PF-04217903	372.38	956905-27-4	c-Met	C19H16N8O	Free Base	N/A	OCCN1C=C(C=N1)C1=NC2=C(N=NN2CC2=CC3=CC=CN=C3C=C2)N=C1 |c:4,6,13,22,24,27,30,t:9,11,18,20|	1.561	6	1	5
S1100	MLN8054	476.86	869363-13-3	Aurora Kinase	C25H15ClF2N4O2	Free Base	N/A	OC(=O)C1=CC=C(NC2=NC3=C(CN=C(C4=CC(Cl)=CC=C34)C3=C(F)C=CC=C3F)C=N2)C=C1 |c:13,18,24,27,29,33,36,t:3,5,8,10,15,20|	6.192	4	1	4
S1101	Vatalanib (PTK787) 2HCl	419.73	212141-51-0	c-Kit,VEGFR	C20H17Cl3N4	Dihydrochloride	ZK222584	Cl.Cl.ClC1=CC=C(NC2=NN=C(CC3=CC=NC=C3)C3=CC=CC=C23)C=C1 |c:13,15,20,26,t:1,3,6,8,11,18,22|	5.469	3	1	4
S1102	U0126-EtOH	426.56	1173097-76-1	MEK	C20H22N6OS2	Ethanolate	N/A	CCO.N\C(SC1=CC=CC=C1N)=C(C#N)\C(C#N)=C(\N)SC1=CC=CC=C1N |c:7,9,24,26,t:5,22|	2.169	0	5	5
S1103	ZM 447439	513.59	331771-20-1	Aurora Kinase	C29H31N5O4	Free Base	N/A	COC1=C(OCCCN2CCOCC2)C=C2N=CN=C(NC3=CC=C(NC(=O)C4=CC=CC=C4)C=C3)C2=C1 |c:2,17,31,33,36,40,t:15,19,22,24,29|	4.118	6	2	10
S1104	GDC-0879	334.37	905281-76-7	Raf	C19H18N4O2	Free Base	N/A	OCCN1C=C(C(=N1)C1=CC=NC=C1)C1=CC=C2C(CC\C2=N/O)=C1 |c:4,6,11,13,18,26,t:9,16|	2.387	3	1	4
S1105	LY294002	307.34	154447-36-6	Autophagy,PI3K	C19H17NO3	Free Base	N/A	O=C1C=C(OC2=C(C=CC=C12)C1=CC=CC=C1)N1CCOCC1 |c:2,7,15,17,t:5,9,13|	3.342	3	0	2
S1106	OSU-03012 (AR-12)	460.45	742112-33-0	PDK	C26H19F3N4O	Free Base	AR-12	NCC(=O)NC1=CC=C(C=C1)N1N=C(C=C1C1=CC2=C(C=C1)C1=C(C=CC=C1)C=C2)C(F)(F)F |c:7,9,13,15,20,22,27,29,32,t:5,18,25|	5.212	2	2	5
S1107	Danusertib (PHA-739358)	474.55	827318-97-8	Aurora Kinase,Bcr-Abl,c-RET,FGFR	C26H30N6O3	Free Base	N/A	CO[C@@H](C(=O)N1CC2=C(C1)C(NC(=O)C1=CC=C(C=C1)N1CCN(C)CC1)=NN2)C1=CC=CC=C1 |r,c:7,17,19,29,35,37,t:15,33|	2.337	4	2	6
S1109	BI 2536	521.66	755038-02-9	PLK	C28H39N7O3	Free Base	N/A	CC[C@H]1N(C2CCCC2)C2=NC(NC3=CC=C(C=C3OC)C(=O)NC3CCN(C)CC3)=NC=C2N(C)C1=O |r,c:16,18,33,35,t:10,14|	3.548	5	2	7
S1111	Foretinib (GSK1363089)	632.65	849217-64-7	c-Met,VEGFR	C34H34F2N4O6	Free Base	N/A	COC1=CC2=C(C=C1OCCCN1CCOCC1)N=CC=C2OC1=C(F)C=C(NC(=O)C2(CC2)C(=O)NC2=CC=C(F)C=C2)C=C1 |c:4,6,20,22,26,46,49,t:2,29,41,43|	4.437	7	2	12
S1113	GSK690693	425.48	937174-76-0	Akt	C21H27N7O3	Free Base	N/A	CCN1C(=NC2=C1C(OC[C@H]1CCCNC1)=CN=C2C#CC(C)(C)O)C1=NON=C1N |r,c:3,5,17,19,31,t:28|	1.839	6	2	7
S1114	JNJ-38877605	377.35	943540-75-8	c-Met	C19H13F2N7	Free Base	N/A	CN1C=C(C=N1)C1=NN2C(C=C1)=NN=C2C(F)(F)C1=CC2=C(C=C1)N=CC=C2 |c:2,4,11,13,15,23,25,28,30,t:7,21|	3.052	5	0	3
S1117	Triciribine	320.3	35943-35-2	Akt	C13H16N6O4	Free Base	N/A	CN1N=C(N)C2=CN([C@@H]3O[C@H](CO)[C@@H](O)[C@H]3O)C3=C2C1=NC=N3 |r,c:18,24,t:2,5,22|	-1.119	4	4	2
S1119	Cabozantinib (XL184, BMS-907351)	501.51	849217-68-1	TAM Receptor,c-Kit,c-Met,FLT3,Tie-2,VEGFR	C28H24FN3O5	Free Base	BMS-907351	COC1=CC2=C(C=C1OC)C(OC1=CC=C(NC(=O)C3(CC3)C(=O)NC3=CC=C(F)C=C3)C=C1)=CC=N2 |c:4,6,32,35,37,39,t:2,13,15,27,29|	4.342	6	2	8
S1120	Everolimus (RAD001)	958.22	159351-69-6	mTOR	C53H83NO14	Free Base	Certican, Zortress, Afinitor	CO[C@@H]1C[C@H](C[C@H](C)[C@@H]2CC(=O)[C@H](C)\C=C(C)\[C@@H](O)[C@@H](OC)C(=O)[C@H](C)C[C@H](C)\C=C\C=C\C=C(C)\[C@H](C[C@@H]3CC[C@@H](C)[C@@](O)(O3)C(=O)C(=O)N3CCCC[C@H]3C(=O)O2)OC)CC[C@H]1OCCO |r,c:14,33,t:29,31|	6.164	11	2	9
S1124	BMS-754807	461.49	1001350-96-4	c-Met,IGF-1R,Trk receptor	C23H24FN9O	Free Base	N/A	C[C@]1(CCCN1C1=NN2C=CC=C2C(NC2=NNC(=C2)C2CC2)=N1)C(=O)NC1=CC=C(F)N=C1 |r,c:10,12,20,26,37,t:7,17,32,34|	4.069	5	3	6
S1133	Alisertib (MLN8237)	518.92	1028486-01-2	Aurora Kinase	C27H20ClFN4O4	Free Base	Alisertib	COC1=C(C=CC(NC2=NC3=C(CN=C(C4=C3C=CC(Cl)=C4)C3=C(OC)C=CC=C3F)C=N2)=C1)C(O)=O |c:4,13,15,18,21,24,28,30,34,36,t:2,8,10|	5.954	6	1	6
S1134	AT9283	381.43	896466-04-9	Aurora Kinase,Bcr-Abl,JAK	C19H23N7O2	Free Base	N/A	O=C(NC1CC1)NC1=CNN=C1C1=NC2=CC(CN3CCOCC3)=CC=C2N1 |c:11,26,28,t:8,14,16|	1.51	4	4	5
S1138	Brivanib Alaninate (BMS-582664)	441.46	649735-63-7	FGFR,VEGFR	C22H24FN5O4	Alaninate	N/A	C[C@H](COC1=CN2N=CN=C(OC3=C(F)C4=C(NC(C)=C4)C=C3)C2=C1C)OC(=O)[C@H](C)N |r,c:7,12,19,22,26,t:4,9,15|	3.383	6	2	8
S1143	AG-490 (Tyrphostin B42)	294.3	133550-30-8	EGFR,JAK	C17H14N2O3	Free Base	N/A	OC1=C(O)C=C(\C=C(/C#N)C(=O)NCC2=CC=CC=C2)C=C1 |c:1,16,18,21,t:4,14|	2.444	1	3	4
S1145	SNS-032 (BMS-387032)	380.53	345627-80-7	CDK	C17H24N4O2S2	Free Base	BMS-387032	CC(C)(C)C1=CN=C(CSC2=CN=C(NC(=O)C3CCNCC3)S2)O1 |t:4,6,10,12|	2.07	4	2	6
S1147	Barasertib (AZD1152-HQPA)	507.56	722544-51-6	Aurora Kinase	C26H30FN7O3	Free Base	AZD1152	CCN(CCO)CCCOC1=CC=C2C(NC3=CC(CC(=O)NC4=CC=CC(F)=C4)=NN3)=NC=NC2=C1 |c:25,28,30,33,35,38,t:10,12,16,23|	3.493	5	4	13
S1152	PLX-4720	413.83	918505-84-7	Raf	C17H14ClF2N3O3S	Free Base	N/A	CCCS(=O)(=O)NC1=CC=C(F)C(C(=O)C2=CNC3=NC=C(Cl)C=C23)=C1F |c:26,t:7,9,15,18,20,23|	3.435	4	2	6
S1153	Roscovitine (Seliciclib,CYC202)	354.45	186692-46-6	CDK	C19H26N6O	Free Base	N/A	CC[C@H](CO)NC1=NC(NCC2=CC=CC=C2)=C2N=CN(C(C)C)C2=N1 |r,c:13,15,19,26,t:6,11,17|	3.32	3	3	8
S1154	SNS-314 Mesylate	527.04	1146618-41-8	Aurora Kinase	C19H19ClN6O4S3	Mesylate	N/A	CS(O)(=O)=O.ClC1=CC=CC(NC(=O)NC2=NC=C(CCNC3=NC=NC4=C3SC=C4)S2)=C1 |c:7,23,25,29,33,t:5,14,16,21|	3.539	4	3	6
S1164	Lenvatinib (E7080)	426.85	417716-92-8	VEGFR	C21H19ClN4O4	Free Base	N/A	COC1=C(C=C2C(OC3=CC(Cl)=C(NC(=O)NC4CC4)C=C3)=CC=NC2=C1)C(N)=O |c:21,23,25,28,t:2,4,8,11|	2.832	5	3	6
S1167	CP-724714	469.53	537705-08-1	EGFR,HER2	C27H27N5O3	Free Base	N/A	COCC(=O)NC\C=C\C1=CC=C2N=CN=C(NC3=CC=C(OC4=CC=C(C)N=C4)C(C)=C3)C2=C1 |c:13,28,32,36,t:9,11,15,18,20,23,25|	3.987	6	2	9
S1169	TGX-221	364.44	663619-89-4	PI3K	C21H24N4O2	Free Base	N/A	CC(NC1=CC=CC=C1)C1=CC(C)=CN2C(=O)C=C(N=C12)N1CCOCC1 |c:5,7,13,18,t:3,10,20|	2.373	3	1	4
S1170	WZ3146	464.95	1214265-56-1	EGFR	C24H25ClN6O2	Free Base	N/A	CN1CCN(CC1)C1=CC=C(NC2=NC=C(Cl)C(OC3=CC(NC(=O)C=C)=CC=C3)=N2)C=C1 |c:27,29,31,34,t:8,10,13,15,20|	4.823	4	2	7
S1171	CYC116	368.46	693228-63-6	Aurora Kinase,VEGFR	C18H20N6OS	Free Base	N/A	CC1=C(SC(N)=N1)C1=NC(NC2=CC=C(C=C2)N2CCOCC2)=NC=C1 |c:5,14,16,25,27,t:1,8,12|	2.743	4	2	4
S1173	WZ4002	494.18	1213269-23-8	EGFR	C25H27ClN6O3	Free Base	N/A	COC1=C(NC2=NC=C(Cl)C(OC3=CC(NC(=O)C=C)=CC=C3)=N2)C=CC(=C1)N1CCN(C)CC1 |c:2,19,21,23,26,28,t:5,7,12|	4.807	5	2	8
S1177	PD98059	267.28	167869-21-8	MEK	C16H13NO3	Free Base	N/A	COC1=C(N)C(=CC=C1)C1=CC(=O)C2=CC=CC=C2O1 |c:2,5,7,16,18,t:10,14|	2.373	3	1	2
S1178	Regorafenib (BAY 73-4506)	482.82	755037-03-7	c-RET,VEGFR	C21H15ClF4N4O3	Free Base	BAY 73-4506	CNC(=O)C1=CC(OC2=CC(F)=C(NC(=O)NC3=CC=C(Cl)C(=C3)C(F)(F)F)C=C2)=CC=N1 |c:22,29,31,33,t:4,8,11,17,19|	4.381	4	3	6
S1179	WZ8040	481.01	1214265-57-2	EGFR	C24H25ClN6OS	Free Base	N/A	CN1CCN(CC1)C1=CC=C(NC2=NC=C(Cl)C(SC3=CC(NC(=O)C=C)=CC=C3)=N2)C=C1 |c:27,29,31,34,t:8,10,13,15,20|	5.381	3	2	7
S1181	ENMD-2076	375.47	934353-76-1	Aurora Kinase,FLT3,VEGFR	C21H25N7	Tartaric Acid	N/A	CN1CCN(CC1)C1=CC(NC2=NNC(C)=C2)=NC(\C=C\C2=CC=CC=C2)=N1 |c:16,18,25,27,29,t:8,12,23|	4.015	3	2	5
S1194	CUDC-101	434.49	1012054-59-9	EGFR,HDAC,HER2	C24H26N4O4	Free Base	N/A	COC1=CC2=C(C=C1OCCCCCCC(=O)NO)C(NC1=CC(=CC=C1)C#C)=NC=N2 |c:4,6,24,26,30,32,t:2,22|	5.376	5	2	11
S1207	Tivozanib (AV-951)	454.86	475108-18-0	c-Kit,PDGFR,VEGFR	C22H19ClN4O5	Free Base	N/A	COC1=CC2=C(C=C1OC)C(OC1=CC=C(NC(=O)NC3=NOC(C)=C3)C(Cl)=C1)=CC=N2 |c:4,6,25,29,31,33,t:2,13,15,21|	4.039	7	2	6
S1219	YM201636	467.48	371942-69-7	PI3K	C25H21N7O3	Free Base	N/A	NC1=CC=C(C=N1)C(=O)NC1=CC=CC(=C1)C1=NC(N2CCOCC2)=C2OC3=NC=CC=C3C2=N1 |c:3,5,13,15,32,34,38,t:1,11,18,27,30|	2.467	7	2	4
S1220	OSI-930	443.44	728033-96-3	c-Kit,CSF-1R,VEGFR	C22H16F3N3O2S	Free Base	N/A	FC(F)(F)OC1=CC=C(NC(=O)C2=C(NCC3=CC=NC4=CC=CC=C34)C=CS2)C=C1 |c:12,18,22,28,32,t:5,7,16,20,24|	6.266	3	2	7
S1226	KU-0063794	465.54	938440-64-3	mTOR	C25H31N5O4	Free Base	N/A	COC1=C(CO)C=C(C=C1)C1=NC2=NC(=NC(N3CCOCC3)=C2C=C1)N1C[C@H](C)O[C@H](C)C1 |r,c:2,6,8,15,24,27,t:11,13|	3.274	6	1	5
S1230	Flavopiridol (Alvocidib)	401.84	146426-40-6	CDK	C21H20ClNO5	Free Base	Alvocidib	[H][C@@]1(CCN(C)C[C@H]1O)C1=C2OC(=CC(=O)C2=C(O)C=C1O)C1=C(Cl)C=CC=C1 |r,c:10,13,21,25,28,30,t:18|	3.108	2	3	2
S1234	AG-1024	305.17	65678-07-1	IGF-1R	C14H13BrN2O	Free Base	N/A	CC(C)(C)C1=C(O)C(Br)=CC(C=C(C#N)C#N)=C1 |c:4,8,16|	3.922	0	1	2
S1244	Amuvatinib (MP-470)	447.51	850879-09-3	c-Kit,FLT3,PDGFR	C23H21N5O3S	Free Base	N/A	S=C(NCC1=CC=C2OCOC2=C1)N1CCN(CC1)C1=NC=NC2=C1OC1=CC=CC=C21 |c:12,24,26,32,t:4,6,22,30,34|	4.867	5	1	5
S1249	JNJ-7706621	394.36	443797-96-4	Aurora Kinase,CDK	C15H12F2N6O3S	Free Base	N/A	NC1=NC(NC2=CC=C(C=C2)S(N)(=O)=O)=NN1C(=O)C1=C(F)C=CC=C1F |c:7,9,15,21,24,26,t:1,5|	2.226	5	3	4
S1263	CHIR-99021 (CT99021)	465.34	252917-06-9	GSK-3	C22H18Cl2N8	Free Base	CT99021	CC1=CNC(=N1)C1=CN=C(NCCNC2=NC=C(C=C2)C#N)N=C1C1=CC=C(Cl)C=C1Cl |c:4,17,19,24,32,t:1,7,9,15,27,29|	4.476	4	3	7
S1264	PD173074	523.67	219580-11-7	FGFR,VEGFR	C28H41N7O3	Free Base	N/A	CCN(CC)CCCCNC1=NC=C2C=C(C(NC(=O)NC(C)(C)C)=NC2=N1)C1=CC(OC)=CC(OC)=C1 |c:14,24,27,34,38,t:10,12,30|	4.313	6	3	13
S1266	WYE-354	495.53	1062169-56-5	mTOR	C24H29N7O5	Free Base	N/A	COC(=O)NC1=CC=C(C=C1)C1=NC2=C(C=NN2C2CCN(CC2)C(=O)OC)C(=N1)N1CCOCC1 |c:7,9,16,31,t:5,12,14|	1.886	8	1	6
S1267	Vemurafenib (PLX4032, RG7204)	489.92	918504-65-1	Raf	C23H18ClF2N3O3S	Free Base	RG7204	CCCS(=O)(=O)NC1=CC=C(F)C(C(=O)C2=CNC3=NC=C(C=C23)C2=CC=C(Cl)C=C2)=C1F |c:20,31,33,t:7,9,15,18,22,26,28|	4.953	4	2	7
S1274	BX-795	591.47	702675-74-9	IκB/IKK,PDK	C23H26IN7O2S	Free Base	N/A	IC1=CN=C(NC2=CC(NC(=O)N3CCCC3)=CC=C2)N=C1NCCCNC(=O)C1=CC=CS1 |c:17,19,22,34,t:1,3,6,32|	3.704	4	4	9
S1275	BX-912	471.35	702674-56-4	PDK	C20H23BrN8O	Free Base	N/A	BrC1=CN=C(NC2=CC(NC(=O)N3CCCC3)=CC=C2)N=C1NCCC1=CN=CN1 |c:17,19,22,30,t:1,3,6,28|	2.798	4	4	7
S1342	Genistein	270.24	446-72-0	EGFR,Topoisomerase	C15H10O5	Free Base	N/A	OC1=CC=C(C=C1)C1=COC2=C(C(O)=CC(O)=C2)C1=O |c:3,5,14,17,t:1,8,11|	2.14	2	3	1
S1352	TG100-115	346.34	677297-51-7	PI3K	C18H14N6O2	Free Base	N/A	NC1=NC2=NC(C3=CC=CC(O)=C3)=C(N=C2C(N)=N1)C1=CC(O)=CC=C1 |c:8,11,13,15,19,25,27,t:1,3,6,22|	2.687	4	4	2
S1361	MGCD-265	517.6	875337-44-3	c-Met,Tie-2,VEGFR	C26H20FN5O2S2	Free Base	N/A	CN1C=NC(=C1)C1=CC2=NC=CC(OC3=CC=C(NC(=S)NC(=O)CC4=CC=CC=C4)C=C3F)=C2S1 |c:2,4,11,28,30,33,36,t:7,9,15,17,26|	6.037	4	2	8
S1362	Rigosertib (ON-01910)	473.47	1225497-78-8	PLK	C21H24NNaO8S	Sodium Salt	ON-01910	[Na+].COC1=CC(OC)=C(\C=C\S(=O)(=O)CC2=CC=C(OC)C(NCC([O-])=O)=C2)C(OC)=C1 |c:25,30,t:2,6,14,16|	0.632	6	1	11
S1363	Ki8751	469.41	228559-41-9	c-Kit,PDGFR,VEGFR	C24H18F3N3O4	Free Base	N/A	COC1=CC2=NC=CC(OC3=CC=C(NC(=O)NC4=CC=C(F)C=C4F)C(F)=C3)=C2C=C1OC |c:6,23,28,30,33,t:2,4,10,12,18,20|	4.853	5	2	6
S1378	Ruxolitinib (INCB018424)	306.37	941678-49-5	JAK	C17H18N6	Free Base	N/A	N#CC[C@H](C1CCCC1)N1C=C(C=N1)C1=NC=NC2=C1C=CN2 |r,c:11,13,18,20,23,t:16|	2.88	3	1	4
S1392	Pelitinib (EKB-569)	467.92	257933-82-7	EGFR	C24H23ClFN5O2	Free Base	WAY-EKB 569	CCOC1=C(NC(=O)\C=C\CN(C)C)C=C2C(=C1)N=CC(C#N)=C2NC1=CC(Cl)=C(F)C=C1 |c:3,14,16,19,23,33,t:27,30|	4.455	3	2	8
S1451	Aurora A Inhibitor I	588.07	1158838-45-9	Aurora Kinase	C31H31ClFN7O2	Free Base	N/A	CCN1CCN(CC1)C(=O)CC1=CC=C(NC2=NC(NC3=CC=C(C=C3)C(=O)NC3=CC=CC=C3Cl)=C(F)C=N2)C=C1 |c:23,25,33,35,41,44,t:12,14,17,21,31,38|	5.621	4	3	9
S1454	PHA-680632	501.62	398493-79-3	Aurora Kinase	C28H35N7O2	Free Base	N/A	CCC1=CC=CC(CC)=C1NC(=O)N1CC2=C(C1)C(NC(=O)C1=CC=C(C=C1)N1CCN(C)CC1)=NN2 |c:4,8,16,26,28,38,t:2,24|	4.339	3	3	6
S1458	VX-745	436.26	209410-46-8	p38 MAPK	C19H9Cl2F2N3OS	Free Base	N/A	FC1=CC(F)=C(SC2=NN3C=NC(=O)C(=C3C=C2)C2=C(Cl)C=CC=C2Cl)C=C1 |c:10,14,17,20,23,25,29,t:1,4,7|	5.342	3	0	3
S1459	Thiazovivin	311.36	1226056-71-8	ROCK	C15H13N5OS	Free Base	N/A	O=C(NCC1=CC=CC=C1)C1=CSC(NC2=CC=NC=N2)=N1 |c:6,8,18,20,22,t:4,11,16|	2.357	4	2	5
S1460	SP600125	220.23	129-56-6	JNK	C14H8N2O	Free Base	N/A	O=C1C2=C3C(NN=C3C3=C1C=CC=C3)=CC=C2 |c:6,9,12,14,16,18,t:2|	2.994	2	1	0
S1462	AZD6482	408.45	1173900-33-8	PI3K	C22H24N4O4	Free Base	N/A	C[C@@H](NC1=CC=CC=C1C(O)=O)C1=CC(C)=CN2C(=O)C=C(N=C12)N1CCOCC1 |r,c:5,7,16,21,t:3,13,23|	2.003	4	1	5
S1470	Orantinib (TSU-68, SU6668)	310.35	252916-29-3	FGFR,PDGFR,VEGFR	C18H18N2O3	Free Base	SU6668	CC1=C(CCC(O)=O)C(C)=C(N1)\C=C1/C(=O)NC2=CC=CC=C12 |c:1,9,20,t:18,22|	2.868	2	2	4
S1474	GSK429286A	432.37	864082-47-3	ROCK	C21H16F4N4O2	Free Base	N/A	CC1=C(C(CC(=O)N1)C1=CC=C(C=C1)C(F)(F)F)C(=O)NC1=C(F)C=C2NN=CC2=C1 |c:11,13,23,29,32,t:1,9,26|	3.033	3	3	4
S1475	Pimasertib (AS-703026)	431.2	1236699-92-5	MEK	C15H15FIN3O3	Free Base	N/A	OC[C@@H](O)CNC(=O)C1=CC=NC=C1NC1=C(F)C=C(I)C=C1 |r,c:10,12,16,22,t:8,19|	1.171	2	4	6
S1485	HMN-214	424.47	173529-46-9	PLK	C22H20N2O5S	Free Base	N/A	COC1=CC=C(C=C1)S(=O)(=O)N(C(C)=O)C1=C(\C=C\C2=CC=[N+]([O-])C=C2)C=CC=C1 |c:4,6,16,25,28,30,t:2,20,22|	2.282	4	0	6
S1486	AEE788 (NVP-AEE788)	440.58	497839-62-0	EGFR,HER2,VEGFR	C27H32N6	Free Base	N/A	CCN1CCN(CC2=CC=C(C=C2)C2=CC3=C(N[C@H](C)C4=CC=CC=C4)N=CN=C3N2)CC1 |r,c:9,11,16,23,25,28,30,t:7,14,21|	5.042	2	2	7
S1487	PHA-793887	361.48	718630-59-2	CDK	C19H31N5O2	Free Base	N/A	CC(C)CC(=O)NC1=NNC2=C1CN(C(=O)C1CCN(C)CC1)C2(C)C |c:10,t:7|	1.895	3	2	4
S1489	PIK-93	389.88	593960-11-3	PI3K	C14H16ClN3O4S2	Free Base	N/A	CC(=O)NC1=NC(C)=C(S1)C1=CC(=C(Cl)C=C1)S(=O)(=O)NCCO |c:7,16,t:4,11,13|	1.076	4	3	6
S1490	Ponatinib (AP24534)	532.56	943319-70-8	Bcr-Abl,FGFR,PDGFR,VEGFR	C29H27F3N6O	Free Base	N/A	CN1CCN(CC2=C(C=C(NC(=O)C3=CC(C#CC4=CN=C5C=CC=NN45)=C(C)C=C3)C=C2)C(F)(F)F)CC1 |c:22,24,31,34,t:6,8,13,18,20,28|	4.884	3	1	7
S1523	Voxtalisib (SAR245409, XL765) Analogue	599.66	1349796-36-6	mTOR,PI3K	C31H29N5O6S	Free Base	N/A	COC1=CC(NC2=NC3=CC=CC=C3N=C2NS(=O)(=O)C2=CC=C(NC(=O)C3=CC=C(C)C(OC)=C3)C=C2)=CC(OC)=C1 |c:10,12,15,36,39,41,45,t:2,6,8,22,24,29,31|	5.631	8	3	10
S1524	AT7519	382.24	844442-38-2	CDK	C16H17Cl2N5O2	Free Base	N/A	ClC1=CC=CC(Cl)=C1C(=O)NC1=CNN=C1C(=O)NC1CCNCC1 |c:3,6,15,t:1,12|	1.599	3	4	4
S1526	Quizartinib (AC220)	560.67	950769-58-1	FLT3	C29H32N6O4S	Free Base	N/A	CC(C)(C)C1=CC(NC(=O)NC2=CC=C(C=C2)C2=CN3C(SC4=CC(OCCN5CCOCC5)=CC=C34)=N2)=NO1 |c:13,15,35,40,42,t:4,11,18,23,37|	5.064	6	2	8
S1529	Hesperadin	516.65	422513-13-1	Aurora Kinase	C29H32N4O3S	Free Base	N/A	CCS(=O)(=O)NC1=CC=C2NC(=O)\C(C2=C1)=C(/NC1=CC=C(CN2CCCCC2)C=C1)C1=CC=CC=C1 |c:15,32,37,39,t:6,8,20,22,35|	4.071	3	3	8
S1530	BIX 02188	412.48	1094614-84-2	MEK	C26H26N4O2	Free Base	N/A	CNC(=O)C1=CC=C2C(NC(=O)\C2=C(/NC2=CC(CN(C)C)=CC=C2)C2=CC=CC=C2)=C1 |c:6,22,24,29,31,33,t:4,16,27|	3.102	2	3	6
S1531	BIX 02189	440.54	1094614-85-3	MEK	C27H28N4O2	Free Base	N/A	CN(C)CC1=CC=CC(N\C(C2=CC=CC=C2)=C2/C(=O)NC3=CC(=CC=C23)C(=O)N(C)C)=C1 |c:6,13,15,24,34,t:4,11,22,26|	3.308	2	2	6
S1532	AZD7762	362.42	860352-01-8	Chk	C17H19FN4O2S	Free Base	N/A	NC(=O)NC1=C(SC(=C1)C1=CC(F)=CC=C1)C(=O)N[C@H]1CCCNC1 |r,c:7,13,15,t:4,10|	2.009	2	4	4
S1533	R406 (free base)	470.45	841290-80-0	Syk	C22H23FN6O5	Free Base	N/A	COC1=CC(NC2=NC(NC3=NC4=C(OC(C)(C)C(=O)N4)C=C3)=C(F)C=N2)=CC(OC)=C1OC |c:22,27,29,33,t:2,6,10,12,24|	3.881	8	3	7
S1536	CP-673451	417.5	343787-29-1	PDGFR	C24H27N5O2	Free Base	CP673451	COCCOC1=CC=C2N(C=NC2=C1)C1=NC2=C(C=CC=C2C=C1)N1CCC(N)CC1 |c:10,13,20,22,25,t:5,7,16,18|	3.011	4	1	6
S1555	AZD8055	465.54	1009298-09-2	mTOR	C25H31N5O4	Free Base	N/A	COC1=C(CO)C=C(C=C1)C1=NC2=C(C=C1)C(=NC(=N2)N1CCOC[C@@H]1C)N1CCOC[C@@H]1C |r,c:2,6,8,13,15,18,20,t:11|	3.274	6	1	5
S1556	PHT-427	409.61	1191951-57-1	Akt,PDK	C20H31N3O2S2	Free Base	N/A	CCCCCCCCCCCCC1=CC=C(C=C1)S(=O)(=O)NC1=NN=CS1 |c:14,16,25,t:12,23|	6.296	4	1	14
S1557	KRN 633	416.86	286370-15-8	PDGFR,VEGFR	C20H21ClN4O4	Free Base	N/A	CCCNC(=O)NC1=CC=C(OC2=NC=NC3=CC(OC)=C(OC)C=C23)C=C1Cl |c:14,28,t:7,9,12,16,20,24|	4.107	6	2	7
S1558	AT7867	337.85	857531-00-1	Akt,S6 Kinase	C20H20ClN3	Free Base	N/A	ClC1=CC=C(C=C1)C1(CCNCC1)C1=CC=C(C=C1)C1=CNN=C1 |c:3,5,17,19,25,t:1,15,22|	3.85	1	2	3
S1561	BMS-777607	512.89	1025720-94-8	TAM Receptor,c-Met	C25H19ClF2N4O4	Free Base	N/A	CCOC1=C(C(=O)NC2=CC=C(OC3=CC=NC(N)=C3Cl)C(F)=C2)C(=O)N(C=C1)C1=CC=C(F)C=C1 |c:3,15,18,23,29,37,t:8,10,13,32,34|	3.517	5	2	7
S1568	PD318088	561.09	391210-00-7	MEK	C16H13BrF3IN2O4	Free Base	N/A	OCC(O)CONC(=O)C1=C(NC2=CC=C(I)C=C2F)C(F)=C(F)C(Br)=C1 |c:9,17,26,t:12,14,22|	3.327	2	4	7
S1570	KU-60019	547.67	925701-49-1	ATM/ATR	C30H33N3O5S	Free Base	N/A	C[C@H]1CN(CC(=O)NC2=CC3=C(SC4=C(C3)C=CC=C4C3=CC(=O)C=C(O3)N3CCOCC3)C=C2)C[C@@H](C)O1 |r,c:13,17,19,26,37,t:8,10,22|	3.818	5	1	5
S1572	BS-181 HCl	416.99	1397219-81-6	CDK	C22H33ClN6	Hydrochloride	N/A	Cl.CC(C)C1=C2N=C(NCCCCCCN)C=C(NCC3=CC=CC=C3)N2N=C1 |c:3,21,23,28,t:5,15,19|	4.684	2	3	11
S1573	Fasudil (HA-1077) HCl	327.83	105628-07-7	Autophagy,ROCK	C14H18ClN3O2S	Hydrochloride	AT-877	Cl.O=S(=O)(N1CCCNCC1)C1=C2C=CN=CC2=CC=C1 |c:11,13,15,18,20|	0.57	3	1	2
S1574	Doramapimod (BIRB 796)	527.66	285983-48-4	p38 MAPK	C31H37N5O3	Free Base	N/A	CC1=CC=C(C=C1)N1N=C(C=C1NC(=O)NC1=CC=C(OCCN2CCOCC2)C2=C1C=CC=C2)C(C)(C)C |c:3,5,9,11,32,35,37,t:1,18,20|	5.907	4	2	8
S1577	Tie2 kinase inhibitor	439.53	948557-43-5	Tie-2	C26H21N3O2S	Free Base	N/A	COC1=CC2=C(C=C1)C=C(C=C2)C1=C(N=C(N1)C1=CC=C(C=C1)S(C)=O)C1=CC=NC=C1 |c:4,6,9,11,16,22,24,32,34,t:2,14,20,30|	4.57	4	1	5
S1582	H 89 2HCl	519.28	130964-39-5	PKA,S6 Kinase	C20H22BrCl2N3O2S	Dihydrochloride	N/A	Cl.Cl.BrC1=CC=C(\C=C\CNCCNS(=O)(=O)C2=CC=CC3=C2C=CN=C3)C=C1 |c:17,19,22,24,27,t:1,3,15|	3.665	3	2	8
S1590	TWS119	318.33	601514-19-6	GSK-3	C18H14N4O2	Free Base	N/A	NC1=CC(=CC=C1)C1=CC2=C(N1)N=CN=C2OC1=CC=CC(O)=C1 |c:3,5,10,14,16,22,25,t:1,8,20|	3.464	3	3	3
S1802	AICAR (Acadesine)	258.23	2627-69-2	AMPK	C9H14N4O5	Free Base	AICAR, AICA-riboside	NC(=O)C1=C(N)N(C=N1)[C@@H]1O[C@H](CO)[C@@H](O)[C@H]1O |r,c:3,7|	-2.913	3	5	3
S2013	PF-573228	491.49	869288-64-2	FAK	C22H20F3N5O3S	Free Base	N/A	CS(=O)(=O)C1=CC(CNC2=NC(NC3=CC4=C(NC(=O)CC4)C=C3)=NC=C2C(F)(F)F)=CC=C1 |c:23,25,27,33,35,t:4,9,13,15|	3.967	5	3	7
S2014	BMS-265246	345.34	582315-72-8	CDK	C18H17F2N3O2	Free Base	N/A	CCCCOC1=C2C=NNC2=NC=C1C(=O)C1=C(F)C=C(C)C=C1F |c:5,7,11,13,18,24,t:21|	4.135	4	1	6
S2111	Lapatinib	581.06	231277-92-2	EGFR,HER2	C29H26ClFN4O4S	Free Base	N/A	CS(=O)(=O)CCNCC1=CC=C(O1)C1=CC=C2N=CN=C(NC3=CC=C(OCC4=CC=CC(F)=C4)C(Cl)=C3)C2=C1 |c:10,18,31,34,38,42,t:8,14,16,20,23,25,29|	6.041	6	2	11
S2134	AZD8330	461.23	869357-68-6	MEK	C16H17FIN3O4	Free Base	N/A	CN1C(=O)C(C)=CC(C(=O)NOCCO)=C1NC1=C(F)C=C(I)C=C1 |c:5,14,18,24,t:21|	1.653	3	3	6
S2158	KW-2449	332.4	1000669-72-6	Aurora Kinase,Bcr-Abl,FLT3	C20H20N4O	Free Base	N/A	O=C(N1CCNCC1)C1=CC=C(\C=C\C2=NNC3=C2C=CC=C3)C=C1 |c:18,21,23,26,t:9,11,15|	2.723	2	2	3
S2161	RAF265 (CHIR-265)	518.41	927880-90-8	Raf,VEGFR	C24H16F6N6O	Free Base	N/A	CN1C(NC2=CC=C(C=C2)C(F)(F)F)=NC2=C1C=CC(OC1=CC=NC(=C1)C1=NC=C(N1)C(F)(F)F)=C2 |c:6,8,14,16,19,25,27,32,39,t:4,23,30|	6.469	4	2	7
S2162	AZD1480	348.77	935666-88-9, 1260222-79-4 (TFA)	JAK	C14H14ClFN8	Free Base	N/A	C[C@H](NC1=NC=C(Cl)C(NC2=NNC(C)=C2)=N1)C1=NC=C(F)C=N1 |r,c:14,16,24,t:3,5,10,19,21|	2.645	5	3	5
S2163	PF-4708671	390.41	1255517-76-0	S6 Kinase	C19H21F3N6	Free Base	PF-04708671	CCC1=CN=CN=C1N1CCN(CC2=NC3=C(N2)C=CC(=C3)C(F)(F)F)CC1 |c:4,6,16,20,22,t:2,14|	3.886	3	1	5
S2179	Gandotinib (LY2784544)	469.94	1229236-86-5	JAK	C23H25ClFN7O	Free Base	N/A	CC1=NNC(NC2=NN3C(CC4=CC=C(Cl)C=C4F)=C(C)N=C3C(CN3CCOCC3)=C2)=C1 |c:16,22,33,35,t:1,6,11,13,19|	3.938	4	2	6
S2185	AST-1306	621.08	1050500-29-2	EGFR	C31H26ClFN4O5S	Mesylate	N/A	CC1=CC=C(C=C1)S(O)(=O)=O.FC1=CC(COC2=CC=C(NC3=C4C=C(NC(=O)C=C)C=CC4=NC=N3)C=C2Cl)=CC=C1 |c:3,5,22,31,34,36,39,42,44,t:1,12,17,19,24|	7.381	4	2	8
S2192	Sapitinib (AZD8931)	473.93	848942-61-0	EGFR,HER2	C23H25ClFN5O3	Free Base	N/A	CNC(=O)CN1CCC(CC1)OC1=C(OC)C=C2N=CN=C(NC3=C(F)C(Cl)=CC=C3)C2=C1 |c:13,19,24,28,30,34,t:17,21|	3.485	5	2	7
S2193	GSK461364	543.6	929095-18-1	PLK	C27H28F3N5O2S	Free Base	N/A	C[C@@H](OC1=C(SC(=C1)N1C=NC2=C1C=C(CN1CCN(C)CC1)C=C2)C(N)=O)C1=CC=CC=C1C(F)(F)F |r,c:6,10,12,26,34,36,t:3,15,32|	5.125	3	1	8
S2194	R406	628.63	841290-81-1	FLT3,Syk	C28H29FN6O8S	Besylate	N/A	OS(=O)(=O)C1=CC=CC=C1.COC1=CC(NC2=NC(NC3=NC4=C(OC(C)(C)C(=O)N4)C=C3)=C(F)C=N2)=CC(OC)=C1OC |c:6,8,32,37,39,43,t:4,12,16,20,22,34|	5.044	8	3	8
S2198	SGI-1776 free base	405.42	1025065-69-3	Pim	C20H22F3N5O	Free Base	N/A	CN1CCC(CNC2=NN3C(C=C2)=NC=C3C2=CC=CC(OC(F)(F)F)=C2)CC1 |c:11,13,15,20,27,t:7,18|	5.206	3	1	6
S2201	BMS-794833	468.84	1174046-72-0	c-Met,VEGFR	C23H15ClF2N4O3	Free Base	BMS794833	NC1=NC=CC(OC2=CC=C(NC(=O)C3=CNC=C(C3=O)C3=CC=C(F)C=C3)C=C2F)=C1Cl |c:3,17,27,30,33,t:1,7,9,14,22,24|	2.85	4	3	5
S2202	NVP-BHG712	503.48	940310-85-0	Bcr-Abl,Ephrin receptor,Raf,Src	C26H20F3N7O	Free Base	N/A	CN1N=CC2=C1N=C(N=C2NC1=CC(=CC=C1C)C(=O)NC1=CC=CC(=C1)C(F)(F)F)C1=CC=CN=C1 |c:2,4,7,9,15,17,26,28,37,39,t:13,24,35|	4.871	5	2	6
S2205	OSI-420	415.87	183320-51-6	EGFR	C21H22ClN3O4	Hydrochloride	CP-473420	Cl.COCCOC1=CC2=C(C=C1OCCO)C(NC1=CC=CC(=C1)C#C)=NC=N2 |c:7,9,20,22,26,28,t:5,18|	4.283	5	2	9
S2207	PIK-293	397.43	900185-01-5	PI3K	C22H19N7O	Free Base	N/A	CC1=CC=CC2=C1C(=O)N(C(CN1N=CC3=C1N=CN=C3N)=N2)C1=C(C)C=CC=C1 |c:3,5,14,16,19,21,24,27,30,32,t:1|	3.162	5	1	3
S2214	AZ 960	354.36	905586-69-8	JAK	C18H16F2N6	Free Base	N/A	C[C@H](NC1=NC(NC2=NNC(C)=C2)=C(F)C=C1C#N)C1=CC=C(F)C=C1 |r,c:11,16,26,t:3,7,13,21,23|	4.495	2	3	5
S2216	Mubritinib (TAK 165)	468.47	366017-09-6	HER2	C25H23F3N4O2	Free Base	TAK 165, TAK165	FC(F)(F)C1=CC=C(\C=C\C2=NC(COC3=CC=C(CCCCN4C=CN=N4)C=C3)=CO2)C=C1 |c:24,26,29,31,35,t:4,6,10,15,17|	5.844	5	0	11
S2218	Torkinib (PP242)	308.34	1092351-67-1	Autophagy,mTOR	C16H16N6O	Free Base	TORKinib	CC(C)N1N=C(C2=CC3=C(N2)C=CC(O)=C3)C2=C(N)N=CN=C12 |c:8,12,15,18,21,t:4,6,23|	2.908	3	3	2
S2219	Momelotinib (CYT387)	414.46	1056634-68-4	JAK	C23H22N6O2	Free Base	CYT 11387	O=C(NCC#N)C1=CC=C(C=C1)C1=NC(NC2=CC=C(C=C2)N2CCOCC2)=NC=C1 |c:8,10,19,21,30,32,t:6,13,17|	2.857	4	2	6
S2220	SB590885	453.54	405554-55-4	Raf	C27H27N5O2	Free Base	GSK2118436	CN(C)CCOC1=CC=C(C=C1)C1=NC(=C(N1)C1=CC=C2C(CC\C2=N/O)=C1)C1=CC=NC=C1 |c:8,10,15,21,29,34,36,t:6,13,19,32|	4.503	4	1	7
S2221	Apatinib	493.58	811803-05-1	VEGFR	C25H27N5O4S	Sulfate	YN968D1	CS(O)(=O)=O.O=C(NC1=CC=C(C=C1)C1(CCCC1)C#N)C1=CC=CN=C1NCC1=CC=NC=C1 |c:9,11,24,26,33,35,t:7,22,31|	3.164	3	2	6
S2226	Idelalisib (CAL-101, GS-1101)	415.42	870281-82-6	PI3K	C22H18FN7O	Free Base	CAL101	CC[C@H](NC1=C2N=CNC2=NC=N1)C1=NC2=CC=CC(F)=C2C(=O)N1C1=CC=CC=C1 |r,c:4,6,10,12,19,22,31,33,t:15,17,29|	3.624	5	2	5
S2227	PIK-294	489.53	900185-02-6	PI3K	C28H23N7O2	Free Base	N/A	CC1=CC=CC2=C1C(=O)N(C(CN1N=C(C3=C(N)N=CN=C13)C1=CC(O)=CC=C1)=N2)C1=C(C)C=CC=C1 |c:3,5,14,16,19,28,30,32,35,38,40,t:1,21,25|	4.867	5	2	4
S2231	Telatinib	409.83	332012-40-5	c-Kit,PDGFR,VEGFR	C20H16ClN5O3	Free Base	N/A	CNC(=O)C1=NC=CC(COC2=NN=C(NC3=CC=C(Cl)C=C3)C3=C2OC=C3)=C1 |c:6,21,24,28,30,t:4,11,13,16,18|	3.861	6	2	6
S2235	Volasertib (BI 6727)	618.81	755038-65-4	PLK	C34H50N8O3	Free Base	N/A	CC[C@H]1N(C(C)C)C2=C(C=NC(NC3=CC=C(C=C3OC)C(=O)N[C@H]3CC[C@@H](CC3)N3CCN(CC4CC4)CC3)=N2)N(C)C1=O |r,c:9,15,17,43,t:7,13|	4.838	5	2	10
S2238	Palomid 529 (P529)	406.43	914913-88-5	mTOR	C24H22O6	Free Base	P529	COC1=CC=C(COC2=C(OC)C=C3C(OC(=O)C4=C3C=CC(=C4)C(C)O)=C2)C=C1 |c:8,12,18,21,23,28,31,t:2,4|	4.257	5	1	6
S2243	Degrasyn (WP1130)	384.27	856243-80-6	Bcr-Abl,DUB	C19H18BrN3O	Free Base	N/A	CCC[C@H](NC(=O)C(=C\C1=NC(Br)=CC=C1)\C#N)C1=CC=CC=C1 |r,c:12,14,21,23,t:9,19|	4.546	2	1	6
S2247	Buparlisib (BKM120, NVP-BKM120)	410.39	944396-07-0	PI3K	C18H21F3N6O2	Free Base	N/A	NC1=CC(=C(C=N1)C1=NC(=NC(=C1)N1CCOCC1)N1CCOCC1)C(F)(F)F |c:3,5,10,12,t:1,8|	2.342	5	1	4
S2266	Asiatic Acid	488.7	464-92-6	p38 MAPK	C30H48O5	Free Base	N/A	[H][C@@]12[C@@H](C)[C@H](C)CC[C@@]1(CC[C@]1(C)C2=CC[C@]2([H])[C@@]3(C)C[C@@H](O)[C@H](O)[C@@](C)(CO)[C@]3([H])CC[C@@]12C)C(O)=O |r,t:15|	4.435	1	3	2
S2310	Honokiol	266.334	35354-74-6	Akt,MEK	C18H18O2	Free Base	N/A	OC1=CC=C(CC=C)C=C1C1=CC(CC=C)=C(O)C=C1 |c:8,19,t:1,3,11,16|	4.88	0	2	5
S2386	Indirubin	262.26	479-41-4	GSK-3	C16H10N2O2	Free Base	N/A	O=C1NC2=CC=CC=C2\C1=C1/NC2=C(C=CC=C2)C1=O |c:5,7,16,18,t:3,14|	1.876	2	2	0
S2391	Quercetin	302.24	117-39-5	Src,Sirtuin,PKC,PI3K	C15H10O7	Free Base	Meletin, Quercetine	OC1=CC(O)=C2C(=O)C(O)=C(OC2=C1)C1=CC=C(O)C(O)=C1 |c:9,13,22,t:1,4,16,18|	1.63	2	5	1
S2406	Chrysophanic Acid	254.24	481-74-3	EGFR,mTOR	C15H10O4	Free Base	Chrysophanol, NSC 37132, NSC 646567	CC1=CC2=C(C(O)=C1)C(=O)C1=C(O)C=CC=C1C2=O |c:3,6,11,14,16,t:1|	2.81	2	2	0
S2542	Phenformin HCl	241.72	834-28-6	AMPK	C10H16ClN5	Hydrochloride	N/A	Cl.NC(=N)NC(=N)NCCC1=CC=CC=C1 |c:11,13,t:9|	1.339	0	3	6
S2554	Daphnetin	178.14	486-35-1	PKA,EGFR,PKC	C9H6O4	Free Base	N/A	OC1=CC=C2C=CC(=O)OC2=C1O |c:5,11,t:1,3|	1.415	2	2	0
S2617	TAK-733	504.23	1035555-63-5	MEK	C17H15F2IN4O4	Free Base	N/A	CN1C(=O)C(F)=C(NC2=CC=C(I)C=C2F)C2=C1N=CN(C[C@@H](O)CO)C2=O |r,c:13,17,20,t:5,8,10|	0.383	3	3	5
S2621	AZD5438	371.46	602306-29-6	CDK	C18H21N5O2S	Free Base	N/A	CC(C)N1C(C)=NC=C1C1=NC(NC2=CC=C(C=C2)S(C)(=O)=O)=NC=C1 |c:5,7,16,18,24,26,t:10,14|	2.966	5	1	5
S2622	PP121	319.36	1092788-83-4	DNA-PK,mTOR,PDGFR	C17H17N7	Free Base	N/A	NC1=NC=NC2=C1C(=NN2C1CCCC1)C1=CN=C2NC=CC2=C1 |c:3,5,8,23,26,t:1,18,20|	2.583	4	2	2
S2624	OSI-027	406.44	936890-98-1	mTOR	C21H22N6O3	Free Base	N/A	COC1=CC=CC2=C1NC(=C2)C1=C2N(N=CN=C2N)C(=N1)[C@H]1CC[C@@H](CC1)C(O)=O |r,c:4,6,10,16,18,22,t:2,13|	3.376	5	2	4
S2625	Fostamatinib (R788)	580.46	901119-35-5	Syk	C23H26FN6O9P	Free Base	N/A	COC1=CC(NC2=NC=C(F)C(NC3=CC=C4OC(C)(C)C(=O)N(COP(O)(O)=O)C4=N3)=N2)=CC(OC)=C1OC |c:31,33,35,39,t:2,6,8,13,15|	3.458	9	2	10
S2626	LY2603618	436.3	911222-45-2	Chk	C18H22BrN5O3	Free Base	N/A	CC1=NC=C(NC(=O)NC2=C(OC[C@@H]3CNCCO3)C=C(C)C(Br)=C2)N=C1 |r,c:9,24,27,t:1,3,20|	1.58	5	3	5
S2634	Rebastinib (DCC-2036)	553.59	1020172-07-9	Bcr-Abl	C30H28FN7O3	Free Base	N/A	CNC(=O)C1=NC=CC(OC2=CC(F)=C(NC(=O)NC3=CC(=NN3C3=CC4=C(C=C3)N=CC=C4)C(C)(C)C)C=C2)=C1 |c:6,21,27,29,32,34,41,43,t:4,10,13,19,25|	5.14	6	3	7
S2635	CCT128930	341.84	885499-61-6	Akt	C18H20ClN5	Free Base	N/A	NC1(CC2=CC=C(Cl)C=C2)CCN(CC1)C1=C2C=CNC2=NC=N1 |c:8,17,19,23,25,t:3,5|	2.813	2	2	3
S2636	A66	393.53	1166227-08-2	PI3K	C17H23N5O2S2	Free Base	N/A	CC1=C(SC(NC(=O)N2CCC[C@H]2C(N)=O)=N1)C1=CSC(=N1)C(C)(C)C |r,c:16,22,t:1,19|	2.383	4	2	4
S2658	Omipalisib (GSK2126458, GSK458)	505.5	1086062-66-9	mTOR,PI3K	C25H17F2N5O3S	Free Base	N/A	COC1=NC=C(C=C1NS(=O)(=O)C1=CC=C(F)C=C1F)C1=CC=C2N=CC=C(C3=CC=NN=C3)C2=C1 |c:4,6,18,26,32,34,38,t:2,13,15,22,24,28,30|	3.705	7	1	6
S2661	WYE-125132 (WYE-132)	519.6	1144068-46-1	mTOR	C27H33N7O4	Free Base	N/A	CNC(=O)NC1=CC=C(C=C1)C1=NC2=C(C=NN2C2CCC3(CC2)OCCO3)C(=N1)N1CC2CCC(C1)O2 |c:7,9,16,32,t:5,12,14|	2.093	7	2	4
S2670	A-674563	358.44	552325-73-2	Akt,CDK,PKA	C22H22N4O	Free Base	N/A	CC1=NNC2=C1C=C(C=C2)C1=CN=CC(OC[C@@H](N)CC2=CC=CC=C2)=C1 |r,c:4,7,9,14,24,26,28,t:1,12,22|	3.212	3	2	6
S2671	AS-252424	305.28	900515-16-4	PI3K	C14H8FNO4S	Free Base	N/A	OC1=C(C=CC(F)=C1)C1=CC=C(O1)\C=C1/SC(=O)NC1=O |c:3,6,11,t:1,9|	3.11	3	2	2
S2672	PF-00562271	665.66	939791-38-5	FAK	C27H26F3N7O6S2	Benzenesulfonic	N/A	OS(=O)(=O)C1=CC=CC=C1.CN(C1=C(CNC2=C(C=NC(NC3=CC=C4NC(=O)CC4=C3)=N2)C(F)(F)F)C=CC=N1)S(C)(=O)=O |c:6,8,12,18,31,33,40,42,t:4,16,22,24|	3.653	6	3	9
S2673	Trametinib (GSK1120212)	615.39	871700-17-3	MEK	C26H23FIN5O4	Free Base	GSK212	CN1C(=O)C(C)=C2N(C(=O)N(C3CC3)C(=O)C2=C1NC1=CC=C(I)C=C1F)C1=CC(NC(C)=O)=CC=C1 |c:18,27,37,39,t:5,22,24,31|	3.176	4	2	5
S2679	Flavopiridol HCl	438.3	131740-09-5	CDK	C21H21Cl2NO5	Hydrochloride	N/A	Cl.[H][C@@]1(CCN(C)C[C@H]1O)C1=C2OC(=CC(=O)C2=C(O)C=C1O)C1=C(Cl)C=CC=C1 |r,c:10,13,21,25,28,30,t:18|	3.49	2	3	2
S2680	Ibrutinib (PCI-32765)	440.5	936563-96-1	BTK	C25H24N6O2	Free Base	N/A	NC1=C2C(=NC=N1)N(N=C2C1=CC=C(OC2=CC=CC=C2)C=C1)C1CCCN(C1)C(=O)C=C |c:3,5,9,19,21,24,t:1,12,14,17,@:7|	3.985	5	1	5
S2681	AS-604850	285.22	648449-76-7	PI3K	C11H5F2NO4S	Free Base	N/A	FC1(F)OC2=C(O1)C=C(C=C2)\C=C1/SC(=O)NC1=O |c:4,8,10|	3.744	4	1	1
S2682	CAY10505	289.28	1218777-13-9	PI3K	C14H8FNO3S	Free Base	N/A	FC1=CC=C(C=C1)C1=CC=C(O1)\C=C1\SC(=O)NC1=O |c:3,5,10,t:1,8|	3.352	3	1	2
S2683	CHIR-124	419.91	405168-58-3	Chk	C23H22ClN5O	Free Base	N/A	ClC1=CC2=C(NC(=O)C(C3=NC4=C(N3)C=CC=C4)=C2N[C@@H]2CN3CCC2CC3)C=C1 |r,c:11,15,17,19,33,t:1,3,9|	3.089	2	3	3
S2686	NVP-BSK805 2HCl	563.47	1092499-93-8 (free base)	JAK	C27H30Cl2F2N6O	HCl	N/A	Cl.Cl.FC1=CC(=CC(F)=C1CN1CCOCC1)C1=C2N=C(C=NC2=CC=C1)C1=CN(N=C1)C1CCNCC1 |c:3,6,17,19,21,24,26,32,t:1,29|	3.92	4	1	5
S2688	R547	441.45	741713-40-6	CDK	C18H21F2N5O4S	Free Base	N/A	COC1=CC=C(F)C(F)=C1C(=O)C1=C(N)N=C(NC2CCN(CC2)S(C)(=O)=O)N=C1 |c:8,13,30,t:2,4,16|	1.133	6	2	6
S2689	WAY-600	494.59	1062159-35-6	mTOR	C28H30N8O	Free Base	N/A	C(N1CCC(CC1)N1N=CC2=C1N=C(N=C2N1CCOCC1)C1=CC2=C(NC=C2)C=C1)C1=CC=CN=C1 |c:9,11,14,16,31,34,39,41,t:26,28,37|	2.946	5	1	5
S2692	TG101209	509.67	936091-14-4	c-RET,FLT3,JAK	C26H35N7O2S	Free Base	N/A	CN1CCN(CC1)C1=CC=C(NC2=NC=C(C)C(NC3=CC(=CC=C3)S(=O)(=O)NC(C)(C)C)=N2)C=C1 |c:22,24,34,37,t:8,10,13,15,20|	4.659	4	3	8
S2696	Apitolisib (GDC-0980, RG7422)	498.6	1032754-93-0	mTOR,PI3K	C23H30N8O3S	Free Base	N/A	C[C@H](O)C(=O)N1CCN(CC2=C(C)C3=NC(=NC(N4CCOCC4)=C3S2)C2=CN=C(N)N=C2)CC1 |r,c:10,15,24,34,t:13,29,31|	1.013	6	2	5
S2697	A-769662	360.39	844499-71-4	AMPK	C20H12N2O3S	Free Base	N/A	OC1=CC=CC=C1C1=CC=C(C=C1)C1=CSC2=C1C(O)=C(C#N)C(=O)N2 |c:3,5,10,12,18,t:1,8,15,22|	3.135	1	3	2
S2699	CH5132799	377.42	1007207-67-1	mTOR,PI3K	C15H19N7O3S	Free Base	N/A	CS(=O)(=O)N1CCC2=C(N=C(N=C12)N1CCOCC1)C1=CN=C(N)N=C1 |c:9,27,t:7,11,22,24|	0.095	7	1	3
S2700	KX2-391	431.53	897016-82-9	Src	C26H29N3O3	Free Base	N/A	O=C(CC1=CC=C(C=N1)C1=CC=C(OCCN2CCOCC2)C=C1)NCC1=CC=CC=C1 |c:5,7,24,31,33,t:3,10,12,29|	3.262	4	1	9
S2703	GSK1838705A	532.57	1116235-97-2	ALK,IGF-1R	C27H29FN8O3	Free Base	N/A	CNC(=O)C1=C(F)C=CC=C1NC1=C2C=CNC2=NC(NC2=C(OC)C=C3CCN(C(=O)CN(C)C)C3=C2)=N1 |c:4,7,9,13,15,19,23,39,41,t:27|	3.508	5	4	8
S2718	TAK-901	504.64	934541-31-8	Aurora Kinase	C28H32N4O3S	Free Base	N/A	CCS(=O)(=O)C1=CC=CC(=C1)C1=CC(C(=O)NC2CCN(C)CC2)=C(C)C2=C1C1=C(N2)N=CC(C)=C1 |c:7,9,28,31,35,38,t:5,12,25|	4.056	4	2	5
S2719	AMG-900	503.58	945595-80-2	Aurora Kinase	C28H21N7OS	Free Base	N/A	CC1=CSC(=C1)C1=NN=C(NC2=CC=C(OC3=C(C=CC=N3)C3=NC(N)=NC=C3)C=C2)C2=C1C=CC=C2 |c:4,19,21,27,29,32,35,38,40,t:1,7,9,12,14,17,24|	6.487	6	2	6
S2720	ZM 336372	389.45	208260-29-1	Raf	C23H23N3O3	Free Base	N/A	CN(C)C1=CC=CC(=C1)C(=O)NC1=CC(NC(=O)C2=CC=C(O)C=C2)=C(C)C=C1 |c:5,7,24,29,t:3,13,19,21,26|	3.805	2	3	5
S2726	PH-797804	477.3	586379-66-0	p38 MAPK	C22H19BrF2N2O3	Free Base	N/A	CNC(=O)C1=CC(N2C(C)=CC(OCC3=CC=C(F)C=C3F)=C(Br)C2=O)=C(C)C=C1 |c:9,19,30,t:4,14,16,22,27|	3.801	3	1	5
S2727	Dacomitinib (PF299804, PF299)	469.94	1110813-31-4	EGFR	C24H25ClFN5O2	Free Base	N/A	COC1=C(NC(=O)\C=C\CN2CCCCC2)C=C2C(NC3=CC(Cl)=C(F)C=C3)=NC=NC2=C1 |c:2,27,29,31,34,t:17,21,24|	5.055	4	2	7
S2728	AG-1478 (Tyrphostin AG-1478)	315.75	153436-53-4	EGFR	C16H14ClN3O2	Free Base	Tyrphostin AG-1478	COC1=C(OC)C=C2C(NC3=CC(Cl)=CC=C3)=NC=NC2=C1 |c:2,13,15,17,19,22,t:6,10|	4.109	4	1	4
S2729	SB415286	359.72	264218-23-7	GSK-3	C16H10ClN3O5	Free Base	N/A	OC1=C(Cl)C=C(NC2=C(C(=O)NC2=O)C2=C(C=CC=C2)[N+]([O-])=O)C=C1 |c:1,17,19,25,t:4,7,15|	2.49	2	3	4
S2730	Crenolanib (CP-868596)	443.54	670220-88-9	PDGFR	C26H29N5O2	Free Base	N/A	CC1(COC2=CC3=C(C=C2)N(C=N3)C2=NC3=C(C=CC=C3C=C2)N2CCC(N)CC2)COC1 |c:6,8,12,19,21,24,t:4,15,17|	3.192	4	1	5
S2736	Fedratinib (SAR302503, TG101348)	524.68	936091-26-8	JAK	C27H36N6O3S	Free Base	N/A	CC1=C(NC2=CC=CC(=C2)S(=O)(=O)NC(C)(C)C)N=C(NC2=CC=C(OCCN3CCCC3)C=C2)N=C1 |c:1,6,8,35,38,t:4,19,22,24|	5.123	5	3	11
S2742	PHA-767491	249.7	942425-68-5	CDK	C12H11N3O.HCl	Free Base	CAY10572	Cl.O=C1NCCC2=C1C=C(N2)C1=CC=NC=C1	1.252	2	2	1
S2743	PF-04691502	425.48	1013101-36-4	Akt,mTOR,PI3K	C22H27N5O4	Free Base	N/A	COC1=CC=C(C=N1)C1=CC2=C(C)N=C(N)N=C2N([C@H]2CC[C@@H](CC2)OCCO)C1=O |r,c:4,6,11,17,t:2,9,14|	1.616	6	2	6
S2745	CHIR-98014	486.31	252935-94-7	GSK-3	C20H17Cl2N9O2	Free Base	N/A	NC1=NC(NCCNC2=NC=C(N3C=CN=C3)C(=N2)C2=CC=C(Cl)C=C2Cl)=CC=C1[N+]([O-])=O |c:13,15,18,26,29,31,t:1,8,10,21,23|	3.859	4	3	8
S2746	AZ 628	451.52	878739-06-1	Raf	C27H25N5O2	Free Base	N/A	CN1C=NC2=C(C=C(NC3=CC(NC(=O)C4=CC(=CC=C4)C(C)(C)C#N)=CC=C3C)C=C2)C1=O |c:2,17,19,26,28,32,t:4,6,9,15|	4.57	3	2	5
S2747	AMG-458	539.58	913376-83-7	c-Met	C30H29N5O5	Free Base	N/A	COC1=CC2=NC=CC(OC3=CN=C(NC(=O)C4=C(C)N(CC(C)(C)O)N(C4=O)C4=CC=CC=C4)C=C3)=C2C=C1 |c:6,17,32,34,37,39,42,t:2,4,10,12,30|	3.125	6	1	8
S2749	BGT226 (NVP-BGT226)	650.6	1245537-68-1	mTOR,PI3K	C32H29F3N6O6	Maleate	N/A	OC(=O)\C=C/C(O)=O.COC1=CC=C(C=N1)C1=CC=C2N=CC3=C(N(C(=O)N3C)C3=CC=C(N4CCNCC4)C(=C3)C(F)(F)F)C2=C1 |c:11,13,20,41,49,t:9,16,18,22,30,32|	1.618	6	1	7
S2751	Milciclib (PHA-848125)	460.57	802539-81-7	CDK	C25H32N8O	Free Base	N/A	CNC(=O)C1=NN(C)C2=C1C(C)(C)CC1=CN=C(NC3=CC=C(C=C3)N3CCN(C)CC3)N=C21 |c:8,22,24,t:4,15,17,20,35|	3.825	4	2	4
S2753	Tivantinib (ARQ 197)	369.42	905854-02-6	c-Met	C23H19N3O2	Free Base	N/A	[H][C@]1(C(=O)NC(=O)[C@@]1([H])C1=CN2CCCC3=CC=CC1=C23)C1=CNC2=C1C=CC=C2 |r,c:18,21,28,31,33,t:10,16,25|	3.52	2	2	2
S2755	Varlitinib	466.94	845272-21-1	EGFR	C22H19ClN6O2S	Free Base	N/A	C[C@@H]1COC(NC2=CC3=C(C=C2)N=CN=C3NC2=CC(Cl)=C(OCC3=NC=CS3)C=C2)=N1 |r,c:8,10,13,15,28,32,34,t:6,19,22,26|	4.577	6	2	7
S2759	CUDC-907	508.55	1339928-25-4	HDAC,PI3K	C23H24N8O4S	Free Base	N/A	COC1=CC=C(C=N1)C1=NC2=C(SC(CN(C)C3=NC=C(C=N3)C(=O)NO)=C2)C(=N1)N1CCOCC1 |c:4,6,20,22,28,31,t:2,9,11,18|	2.303	8	1	7
S2761	NVP-BVU972	340.38	1185763-69-2	c-Met	C20H16N6	Free Base	N/A	CN1C=C(C=N1)C1=NN2C(CC3=CC=C4N=CC=CC4=C3)=CN=C2C=C1 |c:2,4,16,18,21,23,25,28,t:7,12,14|	2.867	4	0	3
S2767	3-Methyladenine (3-MA)	149.15	5142-23-4	Autophagy,PI3K	C6H7N5	Free Base	3-MA	CN1C=NC(N)=C2N=CN=C12 |c:2,7,t:5,9|	-0.236	3	1	0
S2768	Dinaciclib (SCH727965)	396.49	779353-01-4	CDK	C21H28N6O2	Free Base	N/A	CCC1=C2N=C(C=C(NCC3=CC=C[N+]([O-])=C3)N2N=C1)N1CCCC[C@H]1CCO |r,c:2,4,12,15,20,t:6,10|	2.152	2	2	7
S2769	Dovitinib (TKI-258) Dilactic Acid	572.59	852433-84-2	c-Kit,FGFR,FLT3,PDGFR,VEGFR	C27H33FN6O7	Dilactic Acid	CHIR-258 Dilactic acid	CC(O)C(O)=O.CC(O)C(O)=O.CN1CCN(CC1)C1=CC=C2N=C(NC2=C1)C1=C(N)C2=C(NC1=O)C=CC=C2F |c:22,26,29,32,38,40,t:18,20|	-2.038	4	5	4
S2770	MK-5108 (VX-689)	461.94	1010085-13-8	Aurora Kinase	C22H21ClFN3O3S	Free Base	N/A	OC(=O)[C@@]1(CC2=CC=CC(NC3=NC=CS3)=N2)CC[C@@H](CC1)OC1=C(F)C(Cl)=CC=C1 |r,c:7,13,16,26,30,32,t:5,11|	5.574	4	1	7
S2774	MK-2461	495.55	917879-39-1	c-Met,FGFR,PDGFR	C24H25N5O5S	Free Base	N/A	CN(C[C@@H]1COCCO1)S(=O)(=O)NC1=CC2=C(C=C1)C=CC1=C(C=C(C=N1)C1=CN(C)N=C1)C2=O |r,c:16,18,21,25,27,34,t:14,23,30|	0.924	7	1	6
S2783	Vistusertib (AZD2014)	462.54	1009298-59-2	mTOR	C25H30N6O3	Free Base	N/A	CNC(=O)C1=CC=CC(=C1)C1=CC=C2C(N=C(N=C2N2CCOC[C@@H]2C)N2CCOC[C@@H]2C)=N1 |r,c:6,8,13,16,18,36,t:4,11|	3.103	6	1	4
S2784	TAK-285	547.96	871026-44-7	EGFR,HER2	C26H25ClF3N5O3	Free Base	N/A	CC(C)(O)CC(=O)NCCN1C=CC2=C1C(NC1=CC=C(OC3=CC=CC(=C3)C(F)(F)F)C(Cl)=C1)=NC=N2 |c:11,13,25,27,35,37,39,t:18,20,23|	5.586	4	2	10
S2789	Tofacitinib (CP-690550,Tasocitinib)	312.37	477600-75-2	JAK	C16H20N6O	Free Base	Tasocitinib	C[C@@H]1CCN(C[C@@H]1N(C)C1=C2C=CNC2=NC=N1)C(=O)CC#N |r,c:10,12,16,18|	1.512	3	1	3
S2791	Sotrastaurin	438.48	425637-18-9	PKC	C25H22N6O2	Free Base	N/A	CN1CCN(CC1)C1=NC(C2=C(C(=O)NC2=O)C2=CNC3=C2C=CC=C3)=C2C=CC=CC2=N1 |c:22,25,27,31,33,36,t:8,11,19,29|	3.483	4	2	3
S2796	WP1066	356.22	857064-38-1	JAK	C17H14BrN3O	Free Base	N/A	C[C@H](NC(=O)C(=C\C1=NC(Br)=CC=C1)\C#N)C1=CC=CC=C1 |r,c:10,12,19,21,t:7,17|	3.566	2	1	4
S2801	AZD4547	463.57	1035270-39-3	FGFR	C26H33N5O3	Free Base	N/A	COC1=CC(OC)=CC(CCC2=CC(NC(=O)C3=CC=C(C=C3)N3C[C@H](C)N[C@H](C)C3)=NN2)=C1 |r,c:6,19,21,32,35,t:2,11,17|	4.204	4	3	8
S2806	CEP-33779	462.57	1257704-57-6	JAK	C24H26N6O2S	Free Base	N/A	CN1CCN(CC1)C1=CC=CC(NC2=NN3C=CC=C(C3=N2)C2=CC=C(C=C2)S(C)(=O)=O)=C1 |c:10,17,19,22,27,29,35,t:8,14,25|	3.86	4	1	5
S2807	Dabrafenib (GSK2118436)	519.56	1195765-45-7	Raf	C23H20F3N5O2S2	Free Base	N/A	CC(C)(C)C1=NC(=C(S1)C1=NC(N)=NC=C1)C1=C(F)C(NS(=O)(=O)C2=C(F)C=CC=C2F)=CC=C1 |c:6,13,15,18,26,29,31,34,36,t:4,10|	5.377	5	2	6
S2808	Ipatasertib (GDC-0068)	458	1001264-89-6	Akt	C24H32ClN5O2	Free Base	N/A	CC(C)NC[C@@H](C(=O)N1CCN(CC1)C1=C2[C@H](C)C[C@@H](O)C2=NC=N1)C1=CC=C(Cl)C=C1 |r,c:15,23,25,33,t:28,30|	3.102	3	2	6
S2811	INK 128 (MLN0128)	309.33	1224844-38-5	mTOR	C15H15N7O	Free Base	N/A	CC(C)N1N=C(C2=C(N)N=CN=C12)C1=CC2=C(OC(N)=N2)C=C1 |c:4,6,9,21,24,t:11,15,17|	1.886	5	2	2
S2814	Alpelisib (BYL719)	441.47	1217486-61-7	PI3K	C19H22F3N5O2S	Free Base	N/A	CC1=C(SC(NC(=O)N2CCC[C@H]2C(N)=O)=N1)C1=CC(=NC=C1)C(C)(C)C(F)(F)F |r,c:16,21,23,t:1,19|	2.826	4	2	5
S2816	Tyrphostin AG 879	316.46	148741-30-4	HER2	C18H24N2OS	Free Base	N/A	CC(C)(C)C1=CC(=CC(=C1O)C(C)(C)C)\C=C(/C#N)C(N)=S |c:6,8,t:4|	4.565	0	2	4
S2817	Torin 2	432.4	1223001-51-1	ATM/ATR,mTOR	C24H15F3N4O	Free Base	N/A	NC1=CC=C(C=N1)C1=CC=C2N=CC3=C(N(C(=O)C=C3)C3=CC=CC(=C3)C(F)(F)F)C2=C1 |c:3,5,12,19,24,26,34,t:1,8,10,14,22|	4.323	3	1	3
S2820	TAE226 (NVP-TAE226)	468.94	761437-28-9	FAK	C23H25ClN6O3	Free Base	N/A	CNC(=O)C1=C(NC2=C(Cl)C=NC(NC3=C(OC)C=C(C=C3)N3CCOCC3)=N2)C=CC=C1 |c:4,7,10,14,18,20,29,32,34|	3.917	5	3	7
S2823	Tideglusib	334.39	865854-05-3	GSK-3	C19H14N2O2S	Free Base	N/A	O=C1SN(C(=O)N1CC1=CC=CC=C1)C1=C2C=CC=CC2=CC=C1 |c:11,13,16,18,20,23,25,t:9|	4.63	2	0	3
S2824	TPCA-1	279.29	507475-17-4	IκB/IKK	C12H10FN3O2S	Free Base	N/A	NC(=O)NC1=C(C=C(S1)C1=CC=C(F)C=C1)C(N)=O |c:6,15,t:4,10,12|	1.544	2	3	3
S2842	SAR131675	358.39	1433953-83-3	VEGFR	C18H22N4O4	Free Base	N/A	CCN1C(N)=C(C(=O)NC)C(=O)C2=CC=C(N=C12)C#C[C@@](C)(O)COC |r,c:14,t:4,12,16|	0.769	4	2	6
S2843	BI-D1870	391.42	501437-28-1	S6 Kinase	C19H23F2N5O2	Free Base	N/A	CC(C)CCN1C(C)C(=O)N(C)C2=C1N=C(NC1=CC(F)=C(O)C(F)=C1)N=C2 |c:12,25,28,t:15,18,21|	4.069	3	2	5
S2845	Semaxanib (SU5416)	238.28	194413-58-6	VEGFR	C15H14N2O	Free Base	N/A	CC1=CC(C)=C(N1)\C=C1/C(=O)NC2=CC=CC=C12 |c:4,15,t:1,13,17|	2.747	1	2	1
S2859	Golvatinib (E7050)	633.69	928037-13-2	c-Met,VEGFR	C33H37F2N7O4	Free Base	E7050	CN1CCN(CC1)C1CCN(CC1)C(=O)NC1=NC=CC(OC2=CC(F)=C(NC(=O)C3(CC3)C(=O)NC3=CC=C(F)C=C3)C=C2)=C1 |c:20,44,47,49,t:18,24,27,39,41|	3.173	5	3	8
S2864	IMD 0354	383.67	978-62-1	IκB/IKK	C15H8ClF6NO2	Free Base	N/A	OC1=C(C=C(Cl)C=C1)C(=O)NC1=CC(=CC(=C1)C(F)(F)F)C(F)(F)F |c:6,14,16,t:1,3,12|	4.921	1	2	4
S2867	WHI-P154	376.2	211555-04-3	EGFR,JAK	C16H14BrN3O3	Free Base	N/A	COC1=CC2=NC=NC(NC3=CC=C(O)C(Br)=C3)=C2C=C1OC |c:6,16,18,21,t:2,4,10,12|	3.95	4	2	4
S2872	GW5074	520.94	220904-83-6	Raf	C15H8Br2INO2	Free Base	N/A	OC1=C(Br)C=C(\C=C2/C(=O)NC3=CC=C(I)C=C23)C=C1Br |c:1,20,t:4,11,13,16|	4.564	1	2	1
S2882	IKK-16 (IKK Inhibitor VII)	483.63	873225-46-8	IκB/IKK	C28H29N5OS	Free Base	N/A	O=C(N1CCC(CC1)N1CCCC1)C1=CC=C(NC2=NC=CC(=N2)C2=CC3=CC=CC=C3S2)C=C1 |c:22,24,31,33,38,t:15,17,20,27,29|	5.208	3	1	5
S2890	PF-562271	507.49	717907-75-0	FAK	C21H20F3N7O3S	Free Base	N/A	CN(C1=C(CNC2=C(C=NC(NC3=CC=C4NC(=O)CC4=C3)=N2)C(F)(F)F)C=CC=N1)S(C)(=O)=O |c:2,8,21,23,30,32,t:6,12,14|	2.491	6	3	8
S2891	GW441756	275.3	504433-23-2	Trk receptor	C17H13N3O	Free Base	N/A	CN1C=C(C=C2C(=O)NC3=CC=CN=C23)C2=C1C=CC=C2 |w:4.3,c:11,17,20,22,t:2,9,13|	2.508	2	1	1
S2895	Tyrphostin 9	282.38	10537-47-0	EGFR	C18H22N2O	Free Base	Tyrphostin AG 17, Malonaben, NSC 242557, RG-50872	CC(C)(C)C1=CC(C=C(C#N)C#N)=CC(=C1O)C(C)(C)C |c:12,14,t:4|	4.574	0	1	3
S2896	ZM 323881 HCl	411.86	193000-39-4	VEGFR	C22H19ClFN3O2	Hydrochloride	N/A	Cl.CC1=CC(F)=C(NC2=C3C=CC(OCC4=CC=CC=C4)=CC3=NC=N2)C=C1O |c:7,9,16,18,20,23,25,28,t:1,4,14|	5.876	3	2	5
S2897	ZM 306416	333.74	690206-97-4	VEGFR	C16H13ClFN3O2	Free Base	N/A	COC1=CC2=NC=NC(NC3=C(F)C=C(Cl)C=C3)=C2C=C1OC |c:6,10,16,18,21,t:2,4,13|	4.314	4	1	4
S2899	GNF-2	374.32	778270-11-4	Bcr-Abl	C18H13F3N4O2	Free Base	N/A	NC(=O)C1=CC=CC(=C1)C1=NC=NC(NC2=CC=C(OC(F)(F)F)C=C2)=C1 |c:5,7,12,25,27,t:3,10,16,18|	5.209	4	2	6
S2902	S-Ruxolitinib (INCB018424)	306.37	941685-37-6	JAK	C17H18N6	Free Base	N/A	N#CC[C@@H](C1CCCC1)N1C=C(C=N1)C1=NC=NC2=C1C=CN2 |r,c:11,13,18,20,23,t:16|	2.88	3	1	4
S2904	PF-477736	419.48	952021-60-2	Chk	C22H25N7O2	Free Base	PF-00477736	CN1C=C(C=N1)C1=C2C=NNC(=O)C3=C2C(N1)=CC(NC(=O)[C@H](N)C1CCCCC1)=C3 |r,c:2,4,7,9,14,19,33|	2.089	4	4	4
S2911	Go 6983	442.51	133053-19-7	PKC	C26H26N4O3	Free Base	N/A	COC1=CC=C2N(CCCN(C)C)C=C(C2=C1)C1=C(C(=O)NC1=O)C1=CNC2=C1C=CC=C2 |c:13,16,30,33,35,t:2,4,19,27|	3.54	3	2	7
S2913	BAY 11-7082	207.25	19542-67-7	E2 conjugating,IκB/IKK	C10H9NO2S	Free Base	N/A	CC1=CC=C(C=C1)S(=O)(=O)\C=C\C#N |c:3,5,t:1|	1.721	2	0	2
S2922	Icotinib	391.42	610798-31-7	EGFR	C22H21N3O4	Free Base	BPI-2009H	C#CC1=CC(NC2=NC=NC3=C2C=C2OCCOCCOCCOC2=C3)=CC=C1 |c:8,10,26,28,30,t:2,6,13|	4.128	6	1	2
S2924	CHIR-99021 (CT99021) HCl	501.8	252917-06-9 (free base)	GSK-3	C22H19Cl3N8	Hydrochloride	N/A	Cl.CC1=CNC(=N1)C1=CN=C(NCCNC2=NC=C(C=C2)C#N)N=C1C1=CC=C(Cl)C=C1Cl |c:4,17,19,24,32,t:1,7,9,15,27,29|	4.858	4	3	7
S2926	TDZD-8	222.26	327036-89-5	GSK-3	C10H10N2O2S	Free Base	N/A	CN1SC(=O)N(CC2=CC=CC=C2)C1=O |c:9,11,t:7|	2.145	2	0	2
S2928	TAK-715	399.51	303162-79-0	p38 MAPK	C24H21N3OS	Free Base	N/A	CCC1=NC(=C(S1)C1=CC(NC(=O)C2=CC=CC=C2)=NC=C1)C1=CC=CC(C)=C1 |c:4,16,18,20,22,27,30,t:2,8,14,25|	5.629	3	1	5
S3012	Pazopanib	437.52	444731-52-6	c-Kit,PDGFR,VEGFR	C21H23N7O2S	Free Base	N/A	CN(C1=CC2=NN(C)C(C)=C2C=C1)C1=NC(NC2=CC=C(C)C(=C2)S(N)(=O)=O)=NC=C1 |c:9,12,24,30,32,t:2,4,15,19,21|	3.741	5	2	5
S3026	Piceatannol	244.24	10083-24-6	Syk	C14H12O4	Free Base	N/A	OC1=CC(O)=CC(\C=C\C2=CC=C(O)C(O)=C2)=C1 |c:4,15,17,t:1,9,11|	2.848	0	4	2
S3600	Schisandrin B (Sch B)	400.46	61281-37-6	ATM/ATR	C23H28O6	Free Base	N/A	COC1=CC2=C(C(OC)=C1OC)C1=C(C[C@@H](C)[C@@H](C)C2)C=C2OCOC2=C1OC |r,c:4,8,13,28,t:2,22|	5.067	6	0	4
S4001	Cabozantinib malate (XL184)	635.59	1140909-48-3	TAM Receptor,VEGFR	C32H30FN3O10	Malate	N/A	O[C@@H](CC(O)=O)C(O)=O.COC1=CC2=C(C=C1OC)C(OC1=CC=C(NC(=O)C3(CC3)C(=O)NC3=CC=C(F)C=C3)C=C1)=CC=N2 |r,c:12,14,40,43,45,47,t:10,21,23,35,37|	3.331	8	3	11
S4901	JNK-IN-8	507.59	1410880-22-6	JNK	C29H29N7O2	Free Base	N/A	CN(C)C\C=C\C(=O)NC1=CC(=CC=C1)C(=O)NC1=CC=C(NC2=NC=CC(=N2)C2=CC=CN=C2)C(C)=C1 |c:11,13,26,28,33,35,39,t:9,19,21,24,31|	3.997	5	3	9
S4907	SC-514	224.3	354812-17-2	IκB/IKK	C9H8N2OS2	Free Base	N/A	NC(=O)C1=C(N)C=C(S1)C1=CSC=C1 |c:3,6,13,t:10|	1.51	1	2	2
S5001	Tofacitinib (CP-690550) Citrate	504.49	540737-29-9	JAK	C22H28N6O8	Citrate	N/A	OC(=O)CC(O)(CC(O)=O)C(O)=O.C[C@@H]1CCN(C[C@@H]1N(C)C1=C2C=CNC2=NC=N1)C(=O)CC#N |r,c:22,24,28,30|	0.193	6	1	8
S5002	Fingolimod (FTY720) HCl	343.9	162359-56-0	S1P Receptor	C19H34ClNO2	Hydrochloride	Gilenia	Cl.CCCCCCCCC1=CC=C(CCC(N)(CO)CO)C=C1 |c:20,t:8,10|	4.58	0	3	12
S6005	VX-702	404.3	745833-23-2	p38 MAPK	C19H12F4N4O2	Free Base	N/A	NC(=O)N(C1=NC(=C(C=C1)C(N)=O)C1=C(F)C=C(F)C=C1)C1=C(F)C=CC=C1F |c:6,8,14,20,23,26,28,t:4,17|	3.682	3	2	4
S7000	ALK-IN-1	529.01	1197958-12-5	ALK	C26H34ClN6O2P	Free Base	N/A	COC1=CC(=CC=C1NC1=NC=C(Cl)C(NC2=CC=CC=C2P(C)(C)=O)=N1)N1CCC(CC1)N(C)C |c:4,6,19,21,27,t:2,10,12,17|	5.126	6	2	8
S7003	AZD2932	447.49	883986-34-3	PDGFR,VEGFR,FLT3,c-Kit	C24H25N5O4	Free Base	N/A	COC1=C(OC)C=C2C(OC3=CC=C(CC(=O)NC4=CN(N=C4)C(C)C)C=C3)=NC=NC2=C1 |c:2,21,27,29,31,34,t:6,10,12,18|	3.65	7	1	8
S7007	Binimetinib (MEK162, ARRY-162, ARRY-438162)	441.23	606143-89-9	MEK	C17H15BrF2N4O3	Free Base	N/A	CN1C=NC2=C1C=C(C(=O)NOCCO)C(NC1=C(F)C=C(Br)C=C1)=C2F |c:2,4,18,24,26,t:7,21|	2.775	3	3	6
S7008	PP2	301.77	172889-27-9	Src	C15H16ClN5	Free Base	AG 1879	CC(C)(C)N1N=C(C2=C(N)N=CN=C12)C1=CC=C(Cl)C=C1 |c:5,7,10,21,t:12,16,18|	3.435	3	1	2
S7016	VS-5584 (SB2343)	354.41	1246560-33-7	PI3K	C17H22N8O	Free Base	N/A	CC(C)N1C(C)=NC2=C1N=C(N=C2C1=CN=C(N)N=C1)N1CCOCC1 |c:5,7,10,12,20,t:15,17|	1.272	6	1	3
S7018	CZC24832	364.4	1159824-67-5	PI3K	C15H17FN6O2S	Free Base	N/A	CC(C)(C)NS(=O)(=O)C1=CN=CC(=C1)C1=CN2N=C(N)N=C2C(F)=C1 |c:10,12,21,25,t:8,15,18|	0.815	5	2	4
S7028	Duvelisib (IPI-145, INK1197)	416.86	1201438-56-3	PI3K	C22H17ClN6O	Free Base	N/A	C[C@H](NC1=NC=NC2=C1N=CN2)C1=CC2=CC=CC(Cl)=C2C(=O)N1C1=CC=CC=C1 |r,c:5,7,10,18,21,30,32,t:3,14,16,28|	3.648	4	2	4
S7036	XL019	444.53	945755-56-6	JAK	C25H28N6O2	Free Base	N/A	O=C(NC1=CC=C(C=C1)C1=CC=NC(NC2=CC=C(C=C2)N2CCOCC2)=N1)[C@@H]1CCCN1 |r,c:5,7,12,18,20,29,t:3,10,16|	3.106	4	3	6
S7039	PD168393	369.22	194423-15-9	EGFR	C17H13BrN4O	Free Base	N/A	BrC1=CC(NC2=NC=NC3=CC=C(NC(=O)C=C)C=C23)=CC=C1 |c:7,21,23,t:1,5,9,11,18|	4.043	3	2	4
S7041	CX-6258 HCl	498.4	1353859-00-3	Pim	C26H25Cl2N3O3	Hydrochloride	N/A	Cl.CN1CCCN(CC1)C(=O)C1=CC=CC(=C1)C1=CC=C(O1)\C=C1\C(=O)NC2=C1C=C(Cl)C=C2 |c:13,15,20,29,35,t:11,18,32|	4.416	3	1	3
S7050	AZ20	412.51	1233339-22-4	ATM/ATR	C21H24N4O3S	Free Base	N/A	C[C@@H]1COCCN1C1=NC(=NC(=C1)C1(CC1)S(C)(=O)=O)C1=CC=CC2=C1C=CN2 |r,c:10,12,25,27,30,t:8,23|	3.038	5	1	4
S7051	CGI1746	579.69	910232-84-7	BTK	C34H37N5O4	Free Base	N/A	CN1C=C(N=C(NC2=CC=C(C=C2)C(=O)N2CCOCC2)C1=O)C1=CC=CC(NC(=O)C2=CC=C(C=C2)C(C)(C)C)=C1C |c:2,9,11,28,36,38,44,t:4,7,26,34|	3.513	5	2	7
S7060	PP1	281.36	172889-26-8	Src	C16H19N5	Free Base	N/A	CC1=CC=C(C=C1)C1=NN(C2=NC=NC(N)=C12)C(C)(C)C |c:3,5,13,t:1,8,11,16|	3.257	3	1	2
S7063	LY2090314	512.53	603288-22-8	GSK-3	C28H25FN6O3	Free Base	603288-22-8	FC1=CC2=C3N(CCN(C2)C(=O)N2CCCCC2)C=C(C3=C1)C1=C(C(=O)NC1=O)C1=CN=C2C=CC=CN12 |c:20,23,38,40,t:1,3,26,34,36|	2.707	4	1	2
S7065	MK-8745	431.91	885325-71-3	Aurora Kinase	C20H19ClFN5OS	Free Base	N/A	FC1=C(C=CC=C1Cl)C(=O)N1CCN(CC2=CC=CC(NC3=NC=CS3)=N2)CC1 |c:3,5,18,24,27,t:1,16,22|	3.805	3	1	5
S7067	Tepotinib (EMD 1214063)	492.57	1100598-32-0	c-Met	C29H28N6O2	Free Base	N/A	CN1CCC(COC2=CN=C(N=C2)C2=CC=CC(CN3N=C(C=CC3=O)C3=CC(=CC=C3)C#N)=C2)CC1 |c:9,11,16,21,23,30,32,36,t:7,14,28|	3.629	5	0	7
S7080	RN486	606.69	1242156-23-5	BTK	C35H35FN6O3	Free Base	N/A	CN1CCN(CC1)C1=CN=C(NC2=CC(=CN(C)C2=O)C2=CC=CC(N3C=CC4=CC(=CC(F)=C4C3=O)C3CC3)=C2CO)C=C1 |c:15,24,28,32,35,44,49,t:8,10,13,22,30|	3.061	3	2	7
S7083	Ceritinib (LDK378)	558.14	1032900-25-6	ALK	C28H36ClN5O3S	Free Base	N/A	CC(C)OC1=C(NC2=NC(NC3=C(C=CC=C3)S(=O)(=O)C(C)C)=C(Cl)C=N2)C=C(C)C(=C1)C1CCNCC1 |c:4,13,15,26,32,t:7,11,23,29|	6.479	5	3	9
S7087	GSK2334470	462.59	1227911-45-6	PDK	C25H34N8O	Free Base	N/A	CNC1=NC(=CC(=N1)N1C[C@H](CC[C@H]1C)C(=O)NC1CCCCC1)C1=CC2=C(C=C1)C(N)=NN2 |r,c:4,6,29,31,35,t:2,27|	4.516	4	4	5
S7091	Zotarolimus(ABT-578)	966.21	221877-54-9	mTOR	C52H79N5O12	Free Base	N/A	[H][C@@]12CCCCN1C(=O)C(=O)[C@]1(O)O[C@@H](CC[C@H]1C)C[C@H](OC)\C(C)=C\C=C\C=C\[C@@H](C)C[C@@H](C)C(=O)[C@H](OC)[C@H](O)\C(C)=C\[C@@H](C)C(=O)C[C@H](OC2=O)[C@H](C)C[C@@H]1CC[C@@H]([C@@H](C1)OC)N1C=NN=N1 |r,c:70,72,t:26,28,30,45|	5.793	13	1	7
S7093	IPA-3	350.45	42521-82-4	PAK	C20H14O2S2	Free Base	N/A	OC1=CC=C2C=CC=CC2=C1SSC1=C2C=CC=CC2=CC=C1O |c:5,7,10,15,17,19,22,24,t:1,3|	5.871	0	2	3
S7094	PF-3758309	490.62	898044-15-0	PAK	C25H30N8OS	Free Base	PF-03758309	CN(C)C[C@@H](NC(=O)N1CC2=C(NN=C2NC2=NC(C)=NC3=C2SC=C3)C1(C)C)C1=CC=CC=C1 |r,c:13,20,22,26,35,37,t:10,17,33|	4.077	4	3	6
S7102	VE-822	463.55	1232416-25-9	ATM/ATR	C24H25N5O3S	Free Base	N/A	CNCC1=CC=C(C=C1)C1=NOC(=C1)C1=C(N)N=CC(=N1)C1=CC=C(C=C1)S(=O)(=O)C(C)C |c:5,7,13,16,19,21,26,28,t:3,10,24|	3.697	6	2	7
S7104	AZD1208	379.48	1204144-28-4	Pim	C21H21N3O2S	Free Base	N/A	N[C@@H]1CCCN(C1)C1=C(\C=C2/SC(=O)NC2=O)C=CC=C1C1=CC=CC=C1 |r,c:8,19,21,26,28,t:24|	3.283	2	2	3
S7106	AZD3463	448.95	1356962-20-3	ALK	C24H25ClN6O	Free Base	N/A	COC1=C(NC2=NC(C3=CNC4=C3C=CC=C4)=C(Cl)C=N2)C=CC(=C1)N1CCC(N)CC1 |c:2,11,14,16,21,24,26,t:5,8,18|	4.316	3	3	5
S7114	NU6027	251.28	220036-08-8	CDK	C11H17N5O2	Free Base	N/A	NC1=NC(N)=C(N=O)C(OCC2CCCCC2)=N1 |c:17,t:1,4|	2.576	4	2	4
S7121	MLN2480	506.29	1096708-71-2	Raf	C17H12Cl2F3N7O2S	Free Base	BIIB-024	C[C@@H](NC(=O)C1=C(Cl)C(N)=NC=N1)C1=NC=C(S1)C(=O)NC1=NC=C(Cl)C(=C1)C(F)(F)F |r,c:5,9,11,16,28,t:14,23,25|	2.932	6	3	6
S7127	TIC10 Analogue	386.49	41276-02-2	Akt	C24H26N4O	Free Base	TRAIL-inducing Compound 10	CC1=C(CN2C3=NCCN3C(=O)C3=C2CCN(CC2=CC=CC=C2)C3)C=CC=C1 |c:1,13,22,24,29,31,t:5,20|	3.212	2	0	4
S7136	CGK 733	555.84	905973-89-9	ATM/ATR	C23H18Cl3FN4O3S	Free Base	N/A	[O-][N+](=O)C1=CC(NC(=S)NC(NC(=O)C(C2=CC=CC=C2)C2=CC=CC=C2)C(Cl)(Cl)Cl)=CC=C1F |c:17,19,24,26,32,34,t:3,15,22|	6.795	1	3	10
S7145	AZD1080	334.37	612487-72-6	GSK-3	C19H18N4O2	Free Base	N/A	OC1=C(C2=CC(=CC=C2N1)C#N)C1=CC=C(CN2CCOCC2)C=N1 |c:5,7,26,t:1,3,14,16|	2.442	2	2	3
S7153	10058-F4	249.35	403811-55-2	c-Myc	C12H11NOS2	Free Base	N/A	CCC1=CC=C(\C=C2\SC(=S)NC2=O)C=C1 |c:15,t:2,4|	3.783	1	1	2
S7158	abemaciclib (LY2835219)	602.7	1231930-82-7	CDK	C28H36F2N8O3S	Mesylate	N/A	CS(O)(=O)=O.CCN1CCN(CC2=CC=C(NC3=NC(C4=CC(F)=C5N=C(C)N(C(C)C)C5=C4)=C(F)C=N3)N=C2)CC1 |c:32,37,40,t:11,13,16,19,22,24,34|	4.543	4	1	7
S7167	SSR128129E	346.31	848318-25-2	FGFR	C18H15N2NaO4	Free Base	SSR	COC1=C2C=CC=CN2C(C(=O)C2=CC=C(N)C(=C2)C(=O)O[Na])=C1C |c:2,4,6,18,24,t:13,15|	2.802	4	1	5
S7173	CC-292 (AVL-292)	423.44	1202757-89-8	BTK	C22H22FN5O3	Free Base	CC-292	COCCOC1=CC=C(NC2=NC=C(F)C(NC3=CC(NC(=O)C=C)=CC=C3)=N2)C=C1 |c:24,26,28,31,t:5,7,10,12,17|	4.087	5	3	10
S7176	SKI II	302.78	312636-16-1	S1P Receptor	C15H11ClN2OS	Free Base	SphK-I2, Sphingosine Kinase Inhibitor 2	OC1=CC=C(NC2=NC(=CS2)C2=CC=C(Cl)C=C2)C=C1 |c:8,17,20,t:1,3,6,12,14|	4.746	1	2	3
S7177	PF-543	465.6	1415562-82-1	S1P Receptor	C27H31NO4S	Free Base	N/A	CC1=CC(CS(=O)(=O)C2=CC=CC=C2)=CC(OCC2=CC=C(CN3CCC[C@@H]3CO)C=C2)=C1 |r,c:10,12,14,32,34,t:1,8,19,21|	5.016	3	1	9
S7194	GZD824 Dimesylate	724.77	1421783-64-3	Bcr-Abl	C31H35F3N6O7S2	Mesylate	N/A	CS(O)(=O)=O.CS(O)(=O)=O.CN1CCN(CC2=C(C=C(NC(=O)C3=CC(C#CC4=CC5=C(NN=C5)N=C4)=C(C)C=C3)C=C2)C(F)(F)F)CC1 |c:31,34,39,42,t:14,16,21,26,28,36|	4.047	3	2	7
S7195	RKI-1447	326.37	1342278-01-6	ROCK	C16H14N4O2S	Free Base	N/A	OC1=CC(CNC(=O)NC2=NC(=CS2)C2=CC=NC=C2)=CC=C1 |c:11,17,19,21,23,t:1,9,15|	2.081	3	3	4
S7198	BIO	356.17	667463-62-9	GSK-3	C16H10BrN3O2	Free Base	GSK-3 Inhibitor IX, 6-bromoindirubin-3-oxime	O\N=C1C2=CC=CC=C2NC/1=C1\C(=O)NC2=C1C=CC(Br)=C2 |c:5,7,17,20,23,t:3|	2.692	2	2	0
S7206	CNX-2006	545.53	1375465-09-0	EGFR	C26H27F4N7O2	Free Base	N/A	COC1=C(NC2=NC=C(C(NC3=CC=CC(NC(=O)C=C)=C3)=N2)C(F)(F)F)C=CC(NC2CN(CCF)C2)=C1 |c:2,7,13,20,22,29,40,t:5,11|	5.15	4	4	12
S7208	Bisindolylmaleimide I (GF109203X)	412.48	133052-90-1	PKC	C25H24N4O2	Free Base	GO 6850	CN(C)CCCN1C=C(C2=CC=CC=C12)C1=C(C(=O)NC1=O)C1=CNC2=CC=CC=C12 |c:7,11,30,t:9,13,17,25,28,32|	3.557	2	2	6
S7209	GSK650394	382.45	890842-28-1	Others	C25H22N2O2	Free Base	N/A	OC(=O)C1=C(C=C(C=C1)C1=CNC2=NC=C(C=C12)C1=CC=CC=C1)C1CCCC1 |c:5,7,15,23,25,t:3,10,13,17,21|	5.573	2	1	4
S7214	Skepinone-L	425.42	1221485-83-1	p38 MAPK	C24H21F2NO4	Free Base	N/A	OC[C@@H](O)COC1=CC=C2CCC3=CC(NC4=CC=C(F)C=C4F)=CC=C3C(=O)C2=C1 |r,c:21,24,26,32,t:6,8,12,16,18|	4.729	2	3	6
S7215	Losmapimod (GW856553X)	383.46	585543-15-3	p38 MAPK	C22H26FN3O2	Free Base	GW856553X, GW856553, GSK-AHAB	CC1=C(F)C=C(C=C1C1=CC=C(C=N1)C(=O)NCC(C)(C)C)C(=O)NC1CC1 |c:1,4,6,11,13,t:9|	3.689	3	2	6
S7248	Ro3280	543.61	1062243-51-9	PLK	C27H35F2N7O3	Free Base	Ro5203280	COC1=C(NC2=NC3=C(C=N2)N(C)C(=O)C(F)(F)CN3C2CCCC2)C=CC(=C1)C(=O)NC1CCN(C)CC1 |c:2,7,9,28,30,t:5|	3.245	5	2	6
S7253	AZD2858	453.52	486424-20-8	GSK-3	C21H23N7O3S	Free Base	N/A	CN1CCN(CC1)S(=O)(=O)C1=CC=C(C=C1)C1=CN=C(N)C(=N1)C(=O)NC1=CN=CC=C1 |c:13,15,23,31,33,t:11,18,20,29|	0.405	6	2	5
S7257	CNX-774	499.5	1202759-32-7	BTK	C26H22FN7O3	Free Base	N/A	CNC(=O)C1=CC(OC2=CC=C(NC3=NC(NC4=CC=CC(NC(=O)C=C)=C4)=C(F)C=N3)C=C2)=CC=N1 |c:19,26,31,34,36,38,t:4,8,10,13,17,28|	4.281	6	4	9
S7269	PD173955	443.35	260415-63-2	Bcr-Abl	C21H18Cl2N4OS	Free Base	N/A	CSC1=CC(NC2=NC3C(C=N2)C=C(C(=O)N3C)C2=C(Cl)C=CC=C2Cl)=CC=C1 |c:10,13,20,23,25,28,30,t:2,6|	4.854	3	1	4
S7271	FRAX597	558.10	1286739-19-2	PAK	C29H28ClN7OS	Free Base	N/A	CCN1C(=O)C(=CC2=CN=C(NC3=CC=C(C=C3)N3CCN(C)CC3)N=C12)C1=CC=C(C=C1Cl)C1=CN=CS1 |c:5,14,16,33,35,41,t:7,9,12,27,31,39|	5.166	4	1	6
S7284	Rociletinib (CO-1686, AVL-301)	555.55	1374640-70-6	EGFR	C27H28F3N7O3	Free Base	CNX-419, AVL-301	COC1=C(NC2=NC=C(C(NC3=CC=CC(NC(=O)C=C)=C3)=N2)C(F)(F)F)C=CC(=C1)N1CCN(CC1)C(C)=O |c:2,7,13,20,22,29,31,t:5,11|	4.334	5	3	9
S7289	PFK15	260.29	4382-63-2	Others	C17H12N2O	Free Base	PFK-015	O=C(\C=C\C1=CC=C2C=CC=CC2=N1)C1=CC=NC=C1 |c:8,10,13,18,20,t:4,6,16|	3.166	3	0	3
S7291	TAK-632	554.52	1228591-30-7	Raf	C27H18F4N4O3S	Free Base	N/A	FC1=C(NC(=O)CC2=CC=CC(=C2)C(F)(F)F)C=C(OC2=C(C#N)C3=C(C=C2)N=C(NC(=O)C2CC2)S3)C=C1 |c:1,9,11,21,25,27,41,t:7,18,30|	5.74	4	2	8
S7297	Osimertinib (AZD9291)	499.61	1421373-65-0	EGFR	C28H33N7O2	Free Base	N/A	COC1=C(NC2=NC=CC(=N2)C2=CN(C)C3=C2C=CC=C3)C=C(NC(=O)C=C)C(=C1)N(C)CCN(C)C |c:2,7,9,16,19,21,31,t:5,12,24|	4.671	4	2	10
S7317	WZ4003	496.99	1214265-58-3	AMPK	C25H29ClN6O3	Free Base	N/A	CCC(=O)NC1=CC=CC(OC2=NC(NC3=C(OC)C=C(C=C3)N3CCN(C)CC3)=NC=C2Cl)=C1 |c:7,15,19,21,31,33,36,t:5,11|	4.776	5	2	8
S7318	HTH-01-015	468.55	1613724-42-7	AMPK	C26H28N8O	Free Base	N/A	CN1C2=NC(NC3=CN(N=C3)C3CCNCC3)=NC(C)=C2N(C)C(=O)C2=C1C=C1C=CC=CC1=C2 |c:9,18,21,28,33,35,38,t:2,6,31|	2.993	4	2	3
S7319	EHop-016	430.55	1380432-32-5	Rho	C25H30N6O	Free Base	N/A	CCN1C2=C(C=CC=C2)C2=C1C=CC(NC1=NC(NCCCN3CCOCC3)=NC=C1)=C2 |c:5,7,10,13,30,32,34,t:3,17|	4.407	3	2	8
S7320	TG003	249.33	300801-52-9	CDK	C13H15NO2S	Free Base	N/A	CCN1\C(SC2=C1C=C(OC)C=C2)=C\C(C)=O |c:5,12,t:8|	3.024	2	0	3
S7334	ERK5-IN-1	638.81	1435488-37-1	ERK	C36H46N8O3	Free Base	N/A	CCOC1=C(NC2=NC=C3N(C)C(=O)C4=C(C=CC=C4)N(C4CCCC4)C3=N2)C=CC(=C1)C(=O)N1CCC(CC1)N1CCN(C)CC1 |c:3,16,18,29,32,34,t:6,8,14|	4.794	5	1	7
S7343	URMC-099	421.54	1229582-33-5	LRRK2	C27H27N5	Free Base	N/A	CN1CCN(CC2=CC=C(C=C2)C2=CC3=C(NC=C3C3=CC=C4NC=CC4=C3)N=C2)CC1 |c:8,10,18,26,29,32,t:6,13,15,21,23|	4.533	1	2	4
S7352	Bay 11-7085	249.33	196309-76-9	IκB/IKK	C13H15NO2S	Free Base	Bay 11-7083	CC(C)(C)C1=CC=C(C=C1)S(=O)(=O)\C=C\C#N |c:6,8,t:4|	2.635	2	0	3
S7356	HS-173	422.46	1276110-06-5	PI3K	C21H18N4O4S	Free Base	N/A	CCOC(=O)C1=CN=C2C=CC(=CN12)C1=CN=CC(NS(=O)(=O)C2=CC=CC=C2)=C1 |c:9,11,18,27,29,31,t:5,7,16,25|	2.058	6	1	7
S7367	GNE-0877	339.32	1374828-69-9	LRRK2	C14H16F3N7	Free Base	N/A	CNC1=NC(NC2=CN(N=C2C)C(C)(C)C#N)=NC=C1C(F)(F)F |c:9,17,19,t:2,6|	2.871	3	2	5
S7368	GNE-9605	449.83	1536200-31-3	LRRK2	C17H20ClF4N7O	Free Base	N/A	CNC1=NC(NC2=C(Cl)N(N=C2)[C@H]2CCN(C[C@@H]2F)C2COC2)=NC=C1C(F)(F)F |r,c:6,10,25,27,t:2|	2.715	4	2	6
S7397	Sorafenib	464.82	284461-73-0	Raf	C21H16ClF3N4O3	Free Base	BAY 43-9006	CNC(=O)C1=CC(OC2=CC=C(NC(=O)NC3=CC=C(Cl)C(=C3)C(F)(F)F)C=C2)=CC=N1 |c:21,28,30,32,t:4,8,10,16,18|	4.175	4	3	6
S7422	KN-62	721.84	127191-97-3	CaMK	C38H35N5O6S2	Free Base	N/A	CN([C@@H](CC1=CC=C(OS(=O)(=O)C2=C3C=CN=CC3=CC=C2)C=C1)C(=O)N1CCN(CC1)C1=CC=CC=C1)S(=O)(=O)C1=CC=CC2=C1C=CN=C2 |r,c:12,14,16,19,21,24,38,40,48,50,53,55,t:4,6,36,46|	4.532	6	0	10
S7423	KN-93 Phosphate	599.03	1188890-41-6	CaMK	C26H32ClN2O8PS	Free Base	N/A	OP(O)(O)=O.COC1=CC=C(C=C1)S(=O)(=O)N(CCO)C1=CC=CC=C1CN(C)C\C=C\C1=CC=C(Cl)C=C1 |c:8,10,22,24,38,t:6,20,33,35|	4.288	3	1	11
S7435	AR-A014418	308.31	487021-52-3	GSK-3	C12H12N4O4S	Free Base	GSK-3β Inhibitor VIII	COC1=CC=C(CNC(=O)NC2=NC=C(S2)[N+]([O-])=O)C=C1 |c:13,20,t:2,4,11|	1.529	3	2	5
S7461	LDC000067	370.43	1073485-20-7	CDK	C18H18N4O3S	Free Base	LDC067	COC1=CC=CC=C1C1=NC=NC(NC2=CC(CS(N)(=O)=O)=CC=C2)=C1 |c:4,6,11,22,24,26,t:2,9,15|	2.783	5	2	6
S7492	Uprosertib (GSK2141795)	429.25	1047634-65-0	Akt	C18H16Cl2F2N4O2	Free Base	GSK795	CN1N=CC(Cl)=C1C1=C(Cl)OC(=C1)C(=O)N[C@H](CN)CC1=CC(F)=C(F)C=C1 |r,c:2,5,8,12,28,t:22,25|	3.531	3	2	6
S7498	DDR1-IN-1	552.59	1449685-96-4	Others	C30H31F3N4O3	Free Base	N/A	CCN1CCN(CC2=CC=C(C=C2C(F)(F)F)C(=O)NC2=CC(OC3=CC=C4NC(=O)CC4=C3)=C(C)C=C2)CC1 |c:9,11,34,39,t:7,21,25,27,36|	4.972	3	2	8
S7508	JNK Inhibitor IX	332.42	312917-14-9	JNK	C20H16N2OS	Free Base	TCS JNK 5a	O=C(NC1=C(C#N)C2=C(CCCC2)S1)C1=CC=CC2=C1C=CC=C2 |c:3,18,20,23,25,t:7,16|	4.571	1	1	2
S7525	XMD8-92	474.55	1234480-50-2	ERK	C26H30N6O3	Free Base	N/A	CCOC1=CC(=CC=C1NC1=NC2=C(C=N1)N(C)C(=O)C1=C(C=CC=C1)N2C)N1CCC(O)CC1 |c:5,7,13,15,24,26,t:3,11,22|	3.505	4	2	5
S7526	GNF-5	418.37	778277-15-9	Bcr-Abl	C20H17F3N4O3	Free Base	N/A	OCCNC(=O)C1=CC=CC(=C1)C1=CC(NC2=CC=C(OC(F)(F)F)C=C2)=NC=N1 |c:8,10,26,28,30,t:6,13,17,19|	4.876	4	3	8
S7528	GNE-7915	443.4	1351761-44-8	LRRK2	C19H21F4N5O3	Free Base	N/A	CCNC1=NC(NC2=CC(F)=C(C=C2OC)C(=O)N2CCOCC2)=NC=C1C(F)(F)F |c:10,12,25,27,t:3,7|	3.052	5	2	7
S7541	Decernotinib (VX-509)	392.38	944842-54-0	JAK	C18H19F3N6O	Free Base	N/A	CC[C@@](C)(NC1=NC(=NC=C1)C1=CNC2=NC=CC=C12)C(=O)NCC(F)(F)F |r,c:7,9,17,t:5,12,15,19|	2.747	4	3	7
S7544	Vacquinol-1	425.78	5428-80-8（free base）	JNK	C21H23Cl3N2O	dihydrochloride	NSC13316	Cl.Cl.OC(C1CCCCN1)C1=C2C=CC=CC2=NC(=C1)C1=CC=C(Cl)C=C1 |c:9,11,13,16,18,26,t:21,23|	5.364	1	2	3
S7545	G-749	521.41	1457983-28-6	FLT3	C25H25BrN6O2	Free Base	N/A	CN1CCC(CC1)NC1=NC2=C(C(=O)NC=C2Br)C(NC2=CC=C(OC3=CC=CC=C3)C=C2)=N1 |c:16,29,31,34,36,t:9,11,22,24,27|	3.919	4	3	6
S7563	AT13148	313.78	1056901-62-2	Akt,S6 Kinase,ROCK,PKA	C17H16ClN3O	Free Base	N/A	NC[C@@](O)(C1=CC=C(Cl)C=C1)C1=CC=C(C=C1)C1=CNN=C1 |r,c:9,14,16,22,t:4,6,12,19|	2.491	1	2	4
S7565	WH-4-023	568.67	837422-57-8	Src	C32H36N6O4	Free Base	KIN001-112	COC1=CC=C(N(C(=O)OC2=C(C)C=CC=C2C)C2=CC=NC(NC3=CC=C(C=C3)N3CCN(C)CC3)=N2)C(OC)=C1 |c:10,13,15,21,27,29,39,44,t:2,4,19,25|	6.843	6	1	9
S7566	IM-12	377.41	1129669-05-1	GSK-3	C22H20FN3O2	Free Base	N/A	CN1C(=O)C(NCCC2=CC=C(F)C=C2)=C(C1=O)C1=C(C)NC2=C1C=CC=C2 |c:13,15,20,24,27,29,t:8,10|	3.074	2	2	5
S7582	Anacardic Acid	348.52	16611-84-0	Histone Acetyltransferase	C22H36O3	Free Base	6-pentadecylsalicylic Acid	CCCCCCCCCCCCCCCC1=CC=CC(O)=C1C(O)=O |c:17,20,t:15|	8.09	1	1	15
S7605	Filgotinib (GLPG0634)	425.5	1206161-97-8	JAK	C21H23N5O3S	Free Base	N/A	O=C(NC1=NN2C(C=CC=C2C2=CC=C(CN3CCS(=O)(=O)CC3)C=C2)=N1)C1CC1 |c:7,9,26,28,t:3,12,14|	2.461	5	1	5
S7627	LDN-214117	419.52	1627503-67-6	TGF-beta/Smad	C25H29N3O3	Free Base	N/A	COC1=CC(=CC(OC)=C1OC)C1=CC(=CN=C1C)C1=CC=C(C=C1)N1CCNCC1 |c:4,8,15,17,23,25,t:2,13,21|	3.533	4	1	6
S7636	SU9516	241.25	377090-84-1	CDK	C13H11N3O2	Free Base	N/A	COC1=CC=C2NC(=O)\C(=C/C3=CN=CN3)C2=C1 |c:13,18,t:2,4,11|	0.893	3	2	2
S7642	D 4476	398.41	301836-43-1	Casein Kinase	C23H18N4O3	Free Base	N/A	NC(=O)C1=CC=C(C=C1)C1=NC(=C(N1)C1=CC=CC=N1)C1=CC2=C(OCCO2)C=C1 |c:5,7,12,18,20,32,t:3,10,16,23,25|	3.464	5	2	4
S7644	PF-431396	506.5	717906-29-1	FAK	C22H21F3N6O3S	Free Base	N/A	CN(C1=CC=CC=C1CNC1=C(C=NC(NC2=CC=C3NC(=O)CC3=C2)=N1)C(F)(F)F)S(C)(=O)=O |c:4,6,13,26,28,t:2,11,17,19|	3.102	5	3	8
S7664	GSK2578215A	399.42	1285515-21-0	LRRK2	C24H18FN3O2	Free Base	N/A	FC1=NC=CC(=C1)C1=CC(C(=O)NC2=CC=CN=C2)=C(OCC2=CC=CC=C2)C=C1 |c:3,5,16,18,26,28,31,t:1,8,14,20,24|	3.985	4	1	6
S7693	AZD6738	412.51	1352226-88-0	ATM/ATR	C20H24N6O2S	Free Base	N/A	C[C@@H]1COCCN1C1=NC(=NC(=C1)C1(CC1)S(C)(=N)=O)C1=C2C=CNC2=NC=C1 |r,c:10,12,23,25,29,31,t:8|	2.427	5	1	4
S7709	VX-11e	500.35	896720-20-0	ERK	C24H20Cl2FN5O2	Free Base	VTX-11e, Vertex-11e	CC1=CN=C(NC2=C(Cl)C=C(F)C=C2)N=C1C1=CNC(=C1)C(=O)N[C@H](CO)C1=CC=CC(Cl)=C1 |r,c:6,12,15,21,32,35,t:1,3,9,18,30|	5.755	3	4	7
S7714	FIIN-2	634.73	1633044-56-0	FGFR	C35H38N8O4	Free Base	N/A	COC1=CC(OC)=CC(=C1)N1CC2=CN=C(NC3=CC=C(C=C3)N3CCN(C)CC3)N=C2N(CC2=CC=C(NC(=O)C=C)C=C2)C1=O |c:6,8,20,22,33,47,t:2,13,15,18,38,40|	5.007	6	2	10
S7722	Bikinin	273.08	188011-69-0	GSK-3	C9H9BrN2O3	Free Base	N/A	OC(=O)CCC(=O)NC1=NC=C(Br)C=C1 |c:13,t:8,10|	0.932	3	1	4
S7725	BLZ945	398.48	953769-46-5	CSF-1R	C20H22N4O3S	Free Base	N/A	CNC(=O)C1=NC=CC(OC2=CC3=C(C=C2)N=C(N[C@@H]2CCCC[C@H]2O)S3)=C1 |r,c:6,12,14,29,t:4,10,17|	3.201	4	3	5
S7734	LFM-A13	360	244240-24-2	BTK	C11H8Br2N2O2	Free Base	N/A	C\C(O)=C(/C#N)C(=O)NC1=C(Br)C=CC(Br)=C1 |c:9,12,15|	2.645	1	2	2
S7741	SB239063	368.4	193551-21-2	p38 MAPK	C20H21FN4O2	Free Base	N/A	COC1=NC=CC(=N1)C1=C(N=CN1[C@H]1CC[C@H](O)CC1)C1=CC=C(F)C=C1 |r,c:4,6,11,28,t:2,9,23,25|	3.661	4	1	4
S7745	ANA-12	407.49	219766-25-3	Trk receptor	C22H21N3O3S	Free Base	N/A	O=C(NC1=CC=CC=C1C(=O)NC1CCCCNC1=O)C1=CC2=C(S1)C=CC=C2 |c:5,7,24,28,30,t:3,22|	3.088	3	3	4
S7747	Ro-3306	351.45	872573-93-8	CDK	C18H13N3OS2	Free Base	N/A	O=C1N=C(NCC2=CC=CS2)S\C1=C/C1=CC=C2N=CC=CC2=C1 |c:8,20,22,25,t:2,6,16,18|	3.712	3	1	4
S7752	SC1	550.53	839707-37-8	ERK	C27H25F3N8O2	Free Base	N/A	CN1N=C(C)C=C1NC1=NC=C2CN(C(=O)N(C)C2=N1)C1=CC(NC(=O)C2=CC=CC(=C2)C(F)(F)F)=CC=C1C |c:5,20,31,33,39,41,t:2,9,11,23,29|	4.789	5	2	6
S7774	SU6656	371.45	330161-87-0	Src	C19H21N3O3S	Free Base	N/A	CN(C)S(=O)(=O)C1=CC=C2NC(=O)\C(=C/C3=CC4=C(CCCC4)N3)C2=C1 |c:27,t:6,8,15,17|	2.616	3	2	3
S7776	Akti-1/2	551.64	612847-09-3	Akt	C34H29N7O	Free Base	N/A	O=C1NC2=C(C=CC=C2)N1C1CCN(CC2=CC=C(C=C2)C2=C(N=C3C=C4NC=NC4=CC3=N2)C2=CC=CC=C2)CC1 |c:5,7,19,21,31,34,37,42,44,t:3,17,24,26,28,40|	5.466	4	2	5
S7793	Purvalanol A	388.89	212844-53-6	CDK	C19H25ClN6O	Free Base	N/A	CC(C)[C@H](CO)NC1=NC(NC2=CC=CC(Cl)=C2)=C2N=CN(C(C)C)C2=N1 |r,c:13,16,20,27,t:7,11,18|	4.462	3	3	7
S7813	AMG319	385.4	1608125-21-8	PI3K	C21H16FN7	Free Base	N/A	C[C@H](NC1=C2N=CNC2=NC=N1)C1=C(N=C2C=C(F)C=CC2=C1)C1=CC=CC=N1 |r,c:3,5,9,11,21,24,29,31,t:14,16,18,27|	3.691	5	2	4
S7847	SGI-7079	455.53	1239875-86-5	VEGFR	C26H26FN7	Free Base	N/A	CN1CCN(CC1)C1=CC=C(NC2=NC3=C(C(C)=CN3)C(=N2)C2=CC(CC#N)=CC=C2)C=C1F |c:18,22,30,32,35,t:8,10,13,15,25|	5.286	2	2	5
S7854	Ulixertinib (BVD-523, VRT752271)	433.33	869886-67-9	ERK	C21H22Cl2N4O2	Free Base	N/A	CC(C)NC1=NC=C(Cl)C(=C1)C1=CNC(=C1)C(=O)N[C@H](CO)C1=CC(Cl)=CC=C1 |r,c:9,15,27,29,t:4,6,12,24|	4.266	2	4	7
S7870	LJH685	381.42	1627710-50-2	S6 Kinase	C22H21F2N3O	Free Base	N/A	CN1CCN(CC1)C1=CC=C(C=C1)C1=C(C=NC=C1)C1=CC(F)=C(O)C(F)=C1 |c:10,12,17,19,29,t:8,15,22,25|	4.004	1	1	3
S7871	LJI308	368.38	1627709-94-7	S6 Kinase	C21H18F2N2O2	Free Base	N/A	OC1=C(F)C=C(C=C1F)C1=C(C=CN=C1)C1=CC=C(C=C1)N1CCOCC1 |c:1,4,6,12,14,19,21,t:10,17|	3.735	2	1	3
S7877	ONO-4059 analogue	456.50	1351635-67-0	BTK	C25H24N6O3	Free Base	ONO-WG-307	NC1=C2N(C(=O)N(C3CCCN(C3)C(=O)C=C)C2=NC=N1)C1=CC=C(OC2=CC=CC=C2)C=C1 |c:1,19,21,31,33,36,t:24,26,29,@:6|	3.38	5	1	5
S7886	CC-223	397.47	1228013-30-6	mTOR	C21H27N5O3	Free Base	N/A	CO[C@H]1CC[C@@H](CC1)N1C(=O)CNC2=NC=C(N=C12)C1=CN=C(C=C1)C(C)(C)O |r,c:16,24,26,t:14,18,22|	1.66	5	1	4
S7898	GSK621	489.91	1346607-05-3	AMPK	C26H20ClN3O5	Free Base	N/A	COC1=CC(=CC=C1)N1C(=O)NC2=C(N(C(Cl)=C2)C2=CC=C(C=C2)C2=C(O)C(OC)=CC=C2)C1=O |c:4,6,17,22,24,27,32,34,t:2,13,20|	5.217	4	2	5
S7928	DASA-58	453.53	1203494-49-8	Others	C19H23N3O6S2	Free Base	N/A	NC1=CC(=CC=C1)S(=O)(=O)N1CCCN(CC1)S(=O)(=O)C1=CC2=C(OCCO2)C=C1 |c:3,5,31,t:1,22,24|	0.632	6	1	4
S7938	GSK2292767	512.58	1254036-66-2	PI3K	C24H28N6O5S	Free Base	N/A	COC1=C(NS(C)(=O)=O)C=C(C=N1)C1=CC2=C(C=NN2)C(=C1)C1=NC=C(CN2C[C@H](C)O[C@H](C)C2)O1 |r,c:2,9,11,18,22,t:14,16,25,27|	1.692	8	2	7
S7953	ETC-1002	344.49	738606-46-7	AMPK	C19H36O5	Free Base	Bempedoic acid|ESP-55016	CC(C)(CCCCCC(O)CCCCCC(C)(C)C(O)=O)C(O)=O	5.18	2	1	14
S7964	PLX7904	512.53	1393465-84-3	Raf	C24H22F2N6O3S	Free Base	PB04	CCN(C)S(=O)(=O)NC1=CC=C(F)C(C(=O)C2=CNC3=NC=C(C=C23)C2=CN=C(N=C2)C2CC2)=C1F |c:21,29,31,37,t:8,10,16,19,23,27|	2.291	6	2	8
S7971	AZD3759	459.90	1626387-80-1	EGFR	C22H23ClFN5O3	Free Base	N/A	COC1=C(OC(=O)N2CCN(C)C[C@H]2C)C=C2C(NC3=CC=CC(Cl)=C3F)=NC=NC2=C1 |r,c:2,22,25,28,30,33,t:16,20|	4.635	5	1	5
S7980	VPS34-IN1	425.91	1383716-33-3	PI3K	C21H24ClN7O	Free Base	Vps34-IN-1	CC(C)(O)CNC1=NC=C(C(CC2CC2)=N1)C1=CC=NC(NC2=CC=NC(Cl)=C2)=N1 |c:8,15,20,26,29,31,t:6,18,24|	3.672	5	2	8
S7998	Entrectinib (RXDX-101)	560.64	1108743-60-7	Trk receptor,ALK	C31H34F2N6O2	Free Base	NMS-E628	CN1CCN(CC1)C1=CC=C(C(=O)NC2=NNC3=C2C=C(CC2=CC(F)=CC(F)=C2)C=C3)C(NC2CCOCC2)=C1 |c:18,27,30,33,44,t:8,10,15,21,24|	4.952	3	3	7
S8002	GSK2636771	433.42	1372540-25-4	PI3K	C22H22F3N3O3	Free Base	N/A	CC1=NC2=C(C=C(C=C2N1CC1=CC=CC(=C1C)C(F)(F)F)N1CCOCC1)C(O)=O |c:5,7,15,17,t:1,3,13|	4.303	3	0	5
S8003	PQ 401	341.79	196868-63-0	IGF-1R	C18H16ClN3O2	Free Base	N/A	COC1=C(NC(=O)NC2=C3C=CC=CC3=NC(C)=C2)C=C(Cl)C=C1 |c:2,8,10,12,15,18,24,t:21|	3.639	3	2	3
S8004	ZM 39923 HCl	367.91	1021868-92-7	JAK	C23H26ClNO	HCl	N/A	Cl.CC(C)N(CCC(=O)C1=CC=C2C=CC=CC2=C1)CC1=CC=CC=C1 |c:12,14,17,23,25,t:8,10,21|	5.424	1	0	7
S8005	SMI-4a	273.23	438190-29-5	Pim	C11H6F3NO2S	Free Base	N/A	FC(F)(F)C1=CC(=CC=C1)\C=C1/SC(=O)NC1=O |c:6,8,t:4|	2.884	2	1	2
S8007	VE-821	368.41	1232410-49-9	ATM/ATR	C18H16N4O3S	Free Base	N/A	CS(=O)(=O)C1=CC=C(C=C1)C1=CN=C(N)C(=N1)C(=O)NC1=CC=CC=C1 |c:6,8,16,24,26,t:4,11,13,22|	2.007	5	2	4
S8009	AG-18	186.17	118409-57-7	EGFR	C10H6N2O2	Free Base	RG-50810	OC1=C(O)C=C(C=C(C#N)C#N)C=C1 |c:1,12,t:4|	1.531	0	2	1
S8015	CEP-32496	517.46	1188910-76-0	CSF-1R,Raf	C24H22F3N5O5	Free Base	N/A	COC1=CC2=NC=NC(OC3=CC(NC(=O)NC4=NOC(=C4)C(C)(C)C(F)(F)F)=CC=C3)=C2C=C1OC |c:6,20,29,31,33,36,t:2,4,10,17|	5.288	8	2	8
S8019	AZD5363	428.92	1143532-39-1	Akt	C21H25ClN6O2	Free Base	N/A	NC1(CCN(CC1)C1=NC=NC2=C1C=CN2)C(=O)N[C@@H](CCO)C1=CC=C(Cl)C=C1 |r,c:10,12,15,31,t:8,26,28|	1.317	3	4	6
S8023	TCS 359	360.43	301305-73-7	FLT3	C18H20N2O4S	Free Base	N/A	COC1=CC=C(C=C1OC)C(=O)NC1=C(C(N)=O)C2=C(CCCC2)S1 |c:4,6,14,t:2,19|	2.753	4	2	5
S8024	Tyrphostin AG 1296	266.29	146535-11-7	c-Kit,FGFR,PDGFR	C16H14N2O2	Free Base	N/A	COC1=CC2=NC=C(N=C2C=C1OC)C1=CC=CC=C1 |c:6,8,11,18,20,t:2,4,16|	3.208	4	0	3
S8031	NSC 23766	530.96	1177865-17-6	Rho	C24H38Cl3N7	HCl	N/A	Cl.Cl.Cl.CCN(CC)CCCC(C)NC1=NC(C)=CC(NC2=CC3=C(N)C=C(C)N=C3C=C2)=N1 |c:14,20,26,29,31,t:11,18,23|	5.477	3	3	10
S8032	PRT062607 (P505-15, BIIB057) HCl	429.91	1370261-97-4,1370261-96-3(free base)	Syk	C19H24ClN9O	Hydrochloride	N/A	Cl.N[C@H]1CCCC[C@H]1NC1=NC=C(C(N)=O)C(NC2=CC(=CC=C2)N2N=CC=N2)=N1 |r,c:20,22,26,28,30,t:9,11,18|	2.033	5	4	6
S8036	Butein	272.25	487-52-5	EGFR	C15H12O5	Free Base	N/A	OC1=CC(O)=C(C=C1)C(=O)\C=C\C1=CC(O)=C(O)C=C1 |c:4,6,19,t:1,13,16|	2.734	1	4	3
S8040	GDC-0349	452.55	1207360-89-1	mTOR	C24H32N6O3	Free Base	RG7603	CCNC(=O)NC1=CC=C(C=C1)C1=NC(N2CCOC[C@@H]2C)=C2CCN(CC2=N1)C1COC1 |r,c:8,10,30,t:6,13,23|	1.982	5	2	5
S8041	Cobimetinib (GDC-0973, RG7420)	531.31	934660-93-2	MEK	C21H21F3IN3O2	Free Base	XL518	OC1(CN(C1)C(=O)C1=C(NC2=CC=C(I)C=C2F)C(F)=C(F)C=C1)[C@@H]1CCCCN1 |r,c:8,16,24,t:11,13,21|	3.701	1	2	4
S8044	BMS-345541	255.32	445430-58-0	IκB/IKK	C14H17N5	Free Base	N/A	CC1=CN=C2N1C1=CC(C)=CC=C1N=C2NCCN |c:3,10,12,15,t:1,7|	1.472	2	2	3
S8050	ETP-46464	470.52	1345675-02-6	ATM/ATR,mTOR	C30H22N4O2	Free Base	N/A	CC(C)(C#N)C1=CC=C(C=C1)N1C(=O)OCC2=C1C1=C(C=CC(=C1)C1=CN=C3C=CC=CC3=C1)N=C2 |c:7,9,17,22,24,31,33,36,39,t:5,20,27,29|	5.813	4	0	3
S8054	ASP3026	580.74	1097917-15-1	ALK	C29H40N8O3S	Free Base	N/A	COC1=CC(=CC=C1NC1=NC(=NC=N1)NC1=CC=CC=C1S(=O)(=O)C(C)C)N1CCC(CC1)N1CCN(C)CC1 |c:4,6,12,14,20,22,t:2,10,18|	4.554	6	2	9
S8057	Pacritinib (SB1518)	472.58	937272-79-2	FLT3,JAK	C28H32N4O3	Free Base	N/A	C(CN1CCCC1)OC1=CC=C2NC3=NC=CC(=N3)C3=CC(COC\C=C\COCC1=C2)=CC=C3 |c:16,18,33,35,37,t:9,11,14,21,27|	4.547	5	1	4
S8058	P276-00	438.3	920113-03-7	CDK	C21H21Cl2NO5	HCl	N/A	Cl.CN1CC[C@H]([C@@H]1CO)C1=C(O)C=C(O)C2=C1OC(=CC2=O)C1=C(Cl)C=CC=C1 |r,c:9,15,19,24,27,29,t:12|	3.49	2	3	3
S8124	BMS-582949	406.48	623152-17-0	p38 MAPK	C22H26N6O2	Free Base	PS540446	CCCNC(=O)C1=CN2N=CN=C(NC3=CC(=CC=C3C)C(=O)NC3CC3)C2=C1C |c:9,16,18,30,t:6,11,14|	3.269	4	3	7
S8167	AMG 337	463.46	1173699-31-4	c-Met	C23H22FN7O3	Free Base	N/A	COCCOC1=CC2=C(C=CN([C@H](C)C3=NN=C4N3C=C(C=C4F)C3=CN(C)N=C3)C2=O)N=C1 |r,c:9,16,20,22,30,36,t:5,7,14,26|	1.188	7	0	7
S8195	Oclacitinib	453.51	1640292-55-2	JAK	C19H27N5O6S	maleate	PF-03394197	OC(=O)\C=C/C(O)=O.CNS(=O)(=O)C[C@H]1CC[C@@H](CC1)N(C)C1=C2C=CNC2=NC=N1 |r,c:22,24,28,30|	1.758	6	2	7
S8201	BI-78D3	379.37	883065-90-5	JNK	C13H9N5O5S2	Free Base	N/A	OC1=NN=C(SC2=NC=C(S2)[N+]([O-])=O)N1C1=CC=C2OCCOC2=C1 |c:8,26,t:1,3,6,17,19|	2.738	5	1	4
S8294	Olmutinib (HM61713, BI 1482694)	486.59	1353550-13-6	EGFR	C26H26N6O2S	Free Base	BI 1482694, HM61713, HM71224	CN1CCN(CC1)C1=CC=C(NC2=NC(OC3=CC=CC(NC(=O)C=C)=C3)=C3SC=CC3=N2)C=C1 |c:19,26,31,34,37,t:8,10,13,17,28|	5.449	4	2	7
S8319	7,8-Dihydroxyflavone	254.24	38183-03-8	Trk receptor	C15H10O4	Free Base	7,8-DHF	OC1=CC=C2C(=O)C=C(OC2=C1O)C1=CC=CC=C1 |c:7,11,17,19,t:1,3,15|	2.652	2	2	1
S8322	LY3023414	406.48	1386874-06-1	Akt	C23H26N4O3	Free Base	GTPL8918	CO[C@@H](C)CN1C(=O)N(C)C2=C1C1=CC(=CC=C1N=C2)C1=CC(=CN=C1)C(C)(C)O |r,c:10,15,17,20,25,27,t:13,23|	1.883	4	0	5
S1037	Perifosine (KRX-0401)	461.66	157716-52-4	Akt	C25H52NO4P	Free Base	NSC639966	CCCCCCCCCCCCCCCCCCOP([O-])(=O)OC1CC[N+](C)(C)CC1	4.607	2	0	20
S1116	Palbociclib (PD-0332991) HCl	483.99	827022-32-2, 571190-30-2 (free base)	CDK	C24H30ClN7O2	Hydrochloride	N/A	Cl.CC(=O)C1=C(C)C2=CN=C(NC3=NC=C(C=C3)N3CCNCC3)N=C2N(C2CCCC2)C1=O |c:3,13,15,25,t:6,8,11|	3.183	5	2	5
S1494	LY2228820	612.74	862507-23-1	p38 MAPK	C26H37FN6O6S2	Mesylate	N/A	CS(O)(=O)=O.CS(O)(=O)=O.CC(C)(C)CN1C(N)=NC2=C1N=C(C=C2)C1=C(N=C(N1)C(C)(C)C)C1=CC=C(F)C=C1 |c:15,17,20,22,27,40,t:25,35,37|	5.117	3	2	5
S3056	Miltefosine	407.57	58066-85-6	Akt	C21H46NO4P	Free Base	N/A	CCCCCCCCCCCCCCCCOP([O-])(=O)OCC[N+](C)(C)C	3.722	2	0	20
S4157	Chloroquine Phosphate	515.86	50-63-5	ATM/ATR,Autophagy	C18H32ClN3O8P2	Diphosphate	N/A	OP(O)(O)=O.OP(O)(O)=O.CCN(CC)CCCC(C)NC1=CC=NC2=C1C=CC(Cl)=C2 |c:21,23,26,29,t:19|	3.408	1	1	8
S7306	Dorsomorphin 2HCl	472.41	1219168-18-9	AMPK	C24H27Cl2N5O	Dihydrochloride	BML-275,Compound C	Cl.Cl.C(CN1CCCCC1)OC1=CC=C(C=C1)C1=CN2N=CC(=C2N=C1)C1=CC=NC=C1 |c:12,14,20,22,25,30,32,t:10,17,28|	3.792	4	0	6
S8197	APTSTAT3-9R	4947.51	NA	STAT	C223H330N80O51	Free Base	N/A	[H]C(NC(=O)C([H])NC(=O)C([H])NC(=O)C(CCCCN)NC(=O)C(CC(C)C)NC(=O)C(CC1=CC=CC=C1)NC(=O)C(CCC(N)=O)NC(=O)C(CC1=CC=C(O)C=C1)NC(=O)C(C)NC(=O)C([H])NC(=O)C(CCCCN)NC(=O)C(CC1=CNC2=C1C=CC=C2)NC(=O)C(NC(=O)C(CC1=CNC2=C1C=CC=C2)NC(=O)C(CCCCN)NC(=O)C([H])NC(=O)C(CC(N)=O)NC(=O)C(CCC(O)=O)NC(=O)C(CC1=CNC2=C1C=CC=C2)NC(=O)C(NC(=O)C(CC1=CNC2=C1C=CC=C2)NC(=O)C(CO)NC(=O)C([H])NC(=O)C1CCCN1C(=O)C(CC1=CNC2=C1C=CC=C…	-24.945	45	74	170
